# Supplementary material for: Unveiling the first indole-fused thiazepine: structure, synthesis and biosynthesis of cyclonasturlexin, a remarkable cruciferous phytoalexin
Source: Royal Society of Chemistry journal article supplement (doi:10.1039/c6cc02108e), 2016-01-01

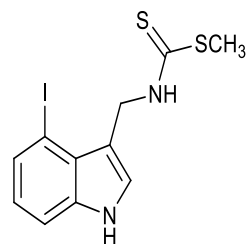

Compound **16** ( $\text{CDCl}_3$ )

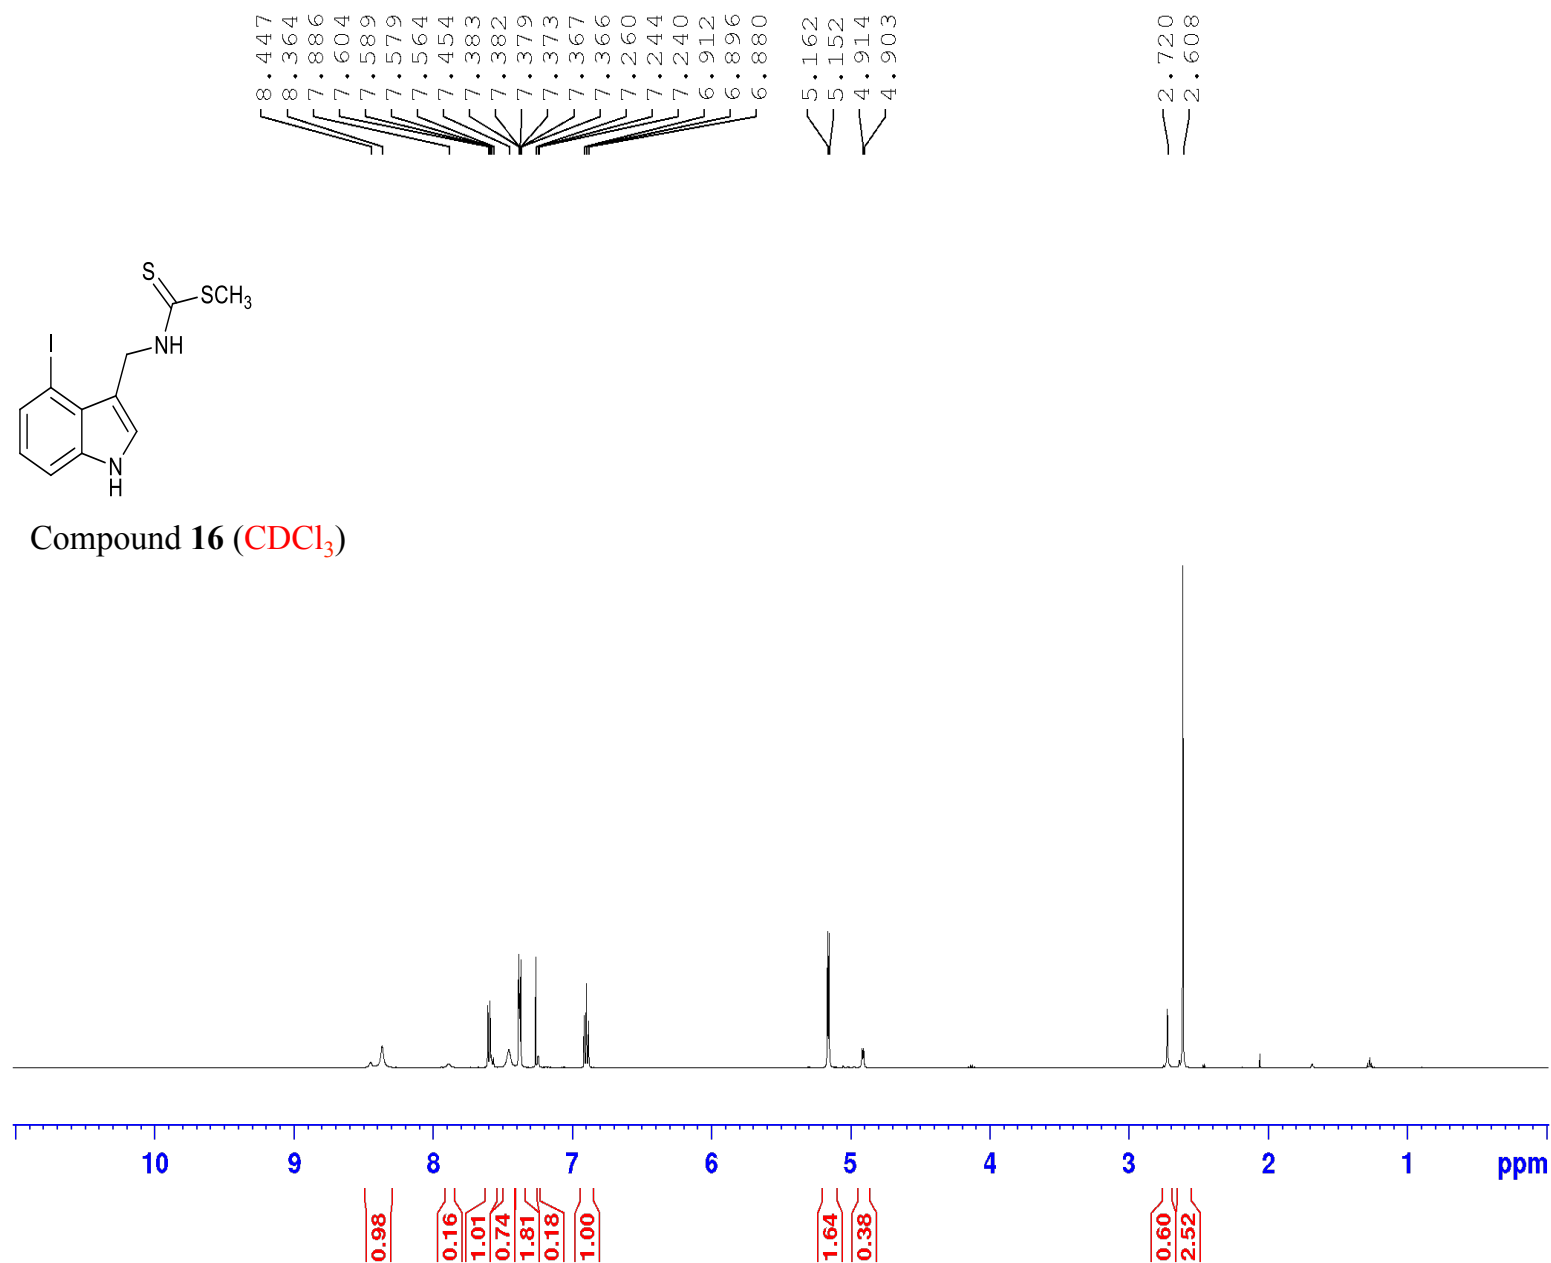

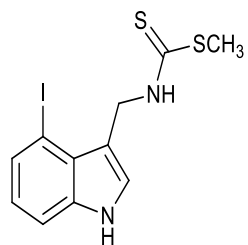

Compound **16** (expansion)

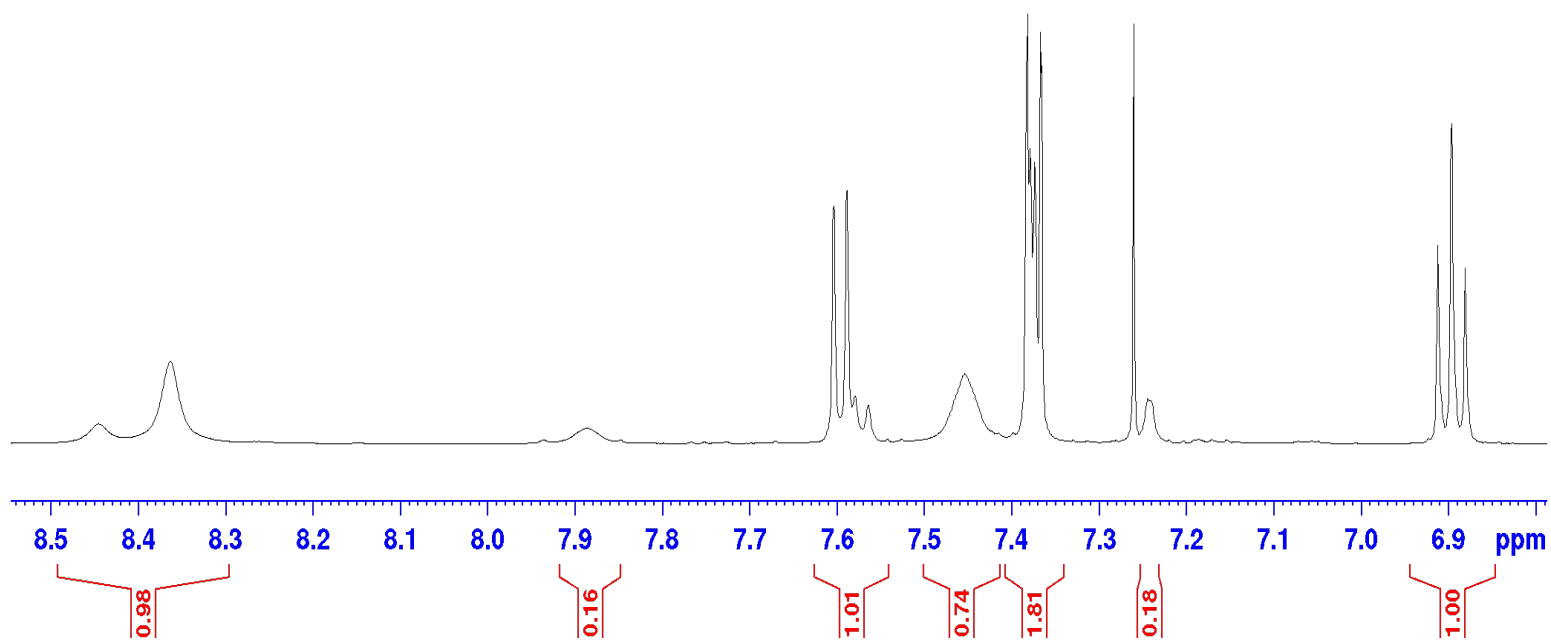

— 8.447

— 8.364

— 7.886

7.604

7.589

7.579

7.564

7.454

7.383

7.382

7.379

7.373

7.367

7.366

7.260

7.244

7.240

6.912

6.896

6.880

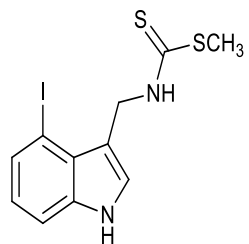

Compound **16** ( $\text{CDCl}_3$ )

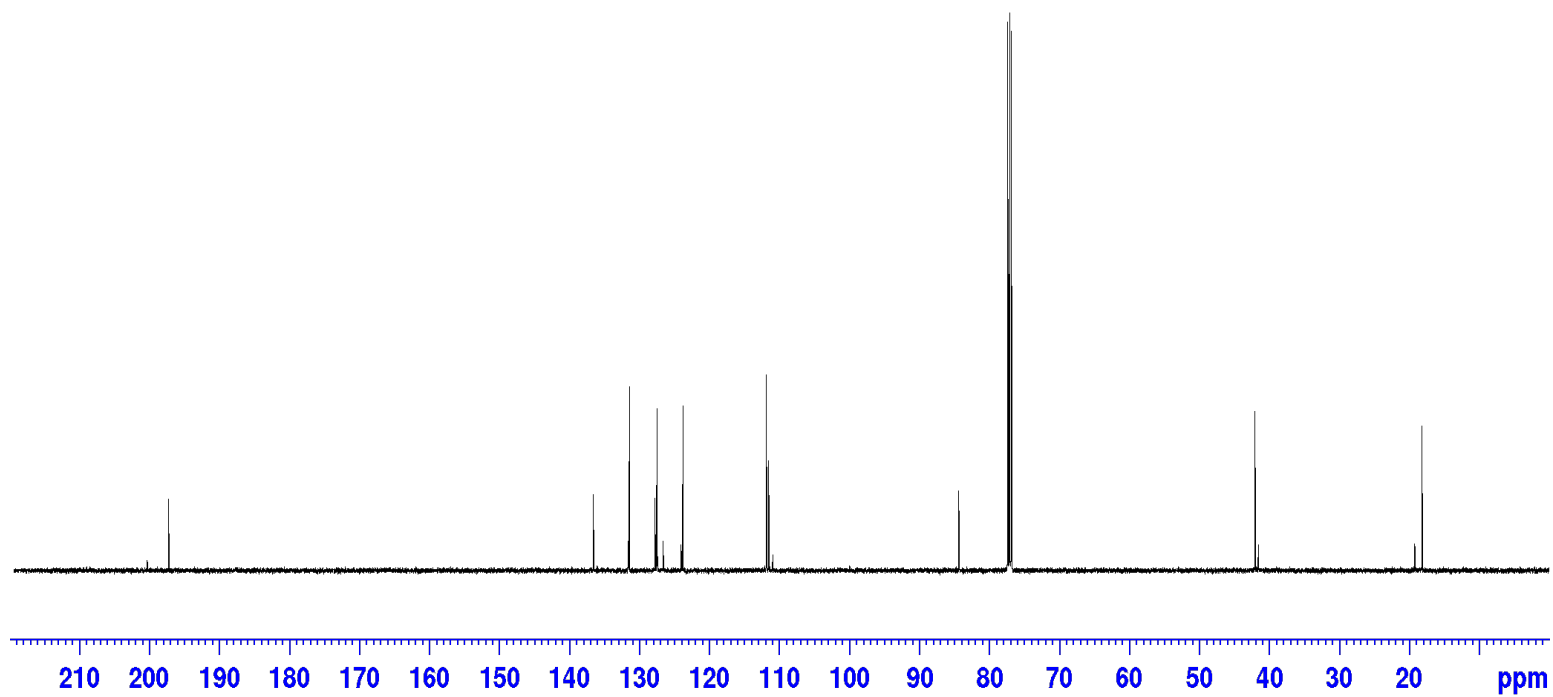



Compound **16** (expansion)

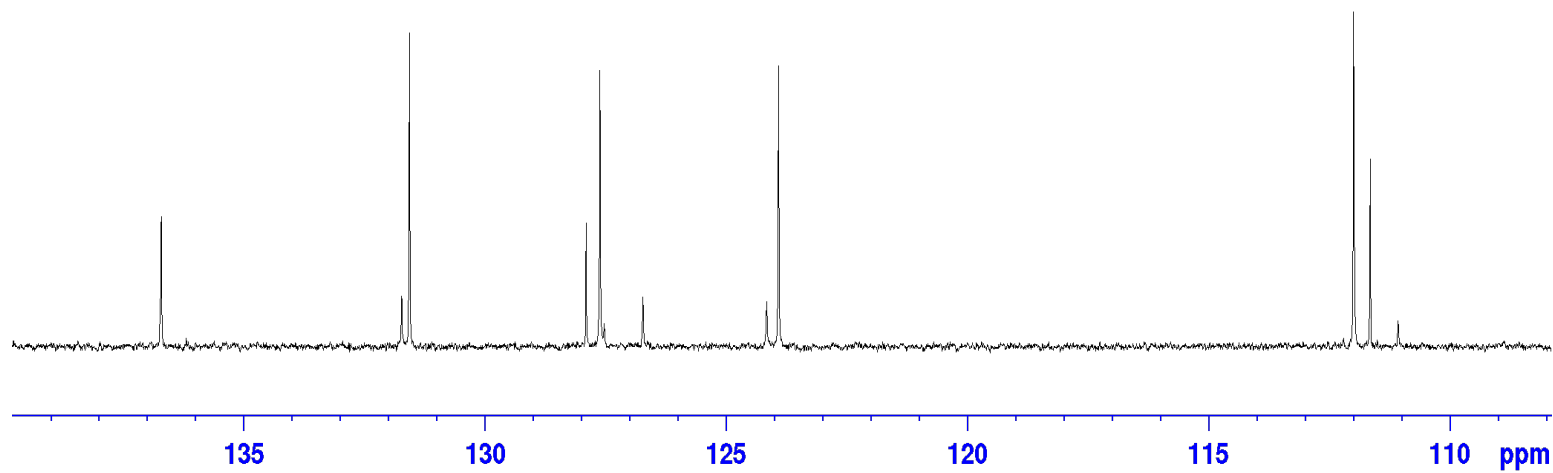

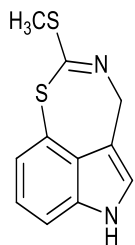

Compound **15** ( $\text{CDCl}_3$ )

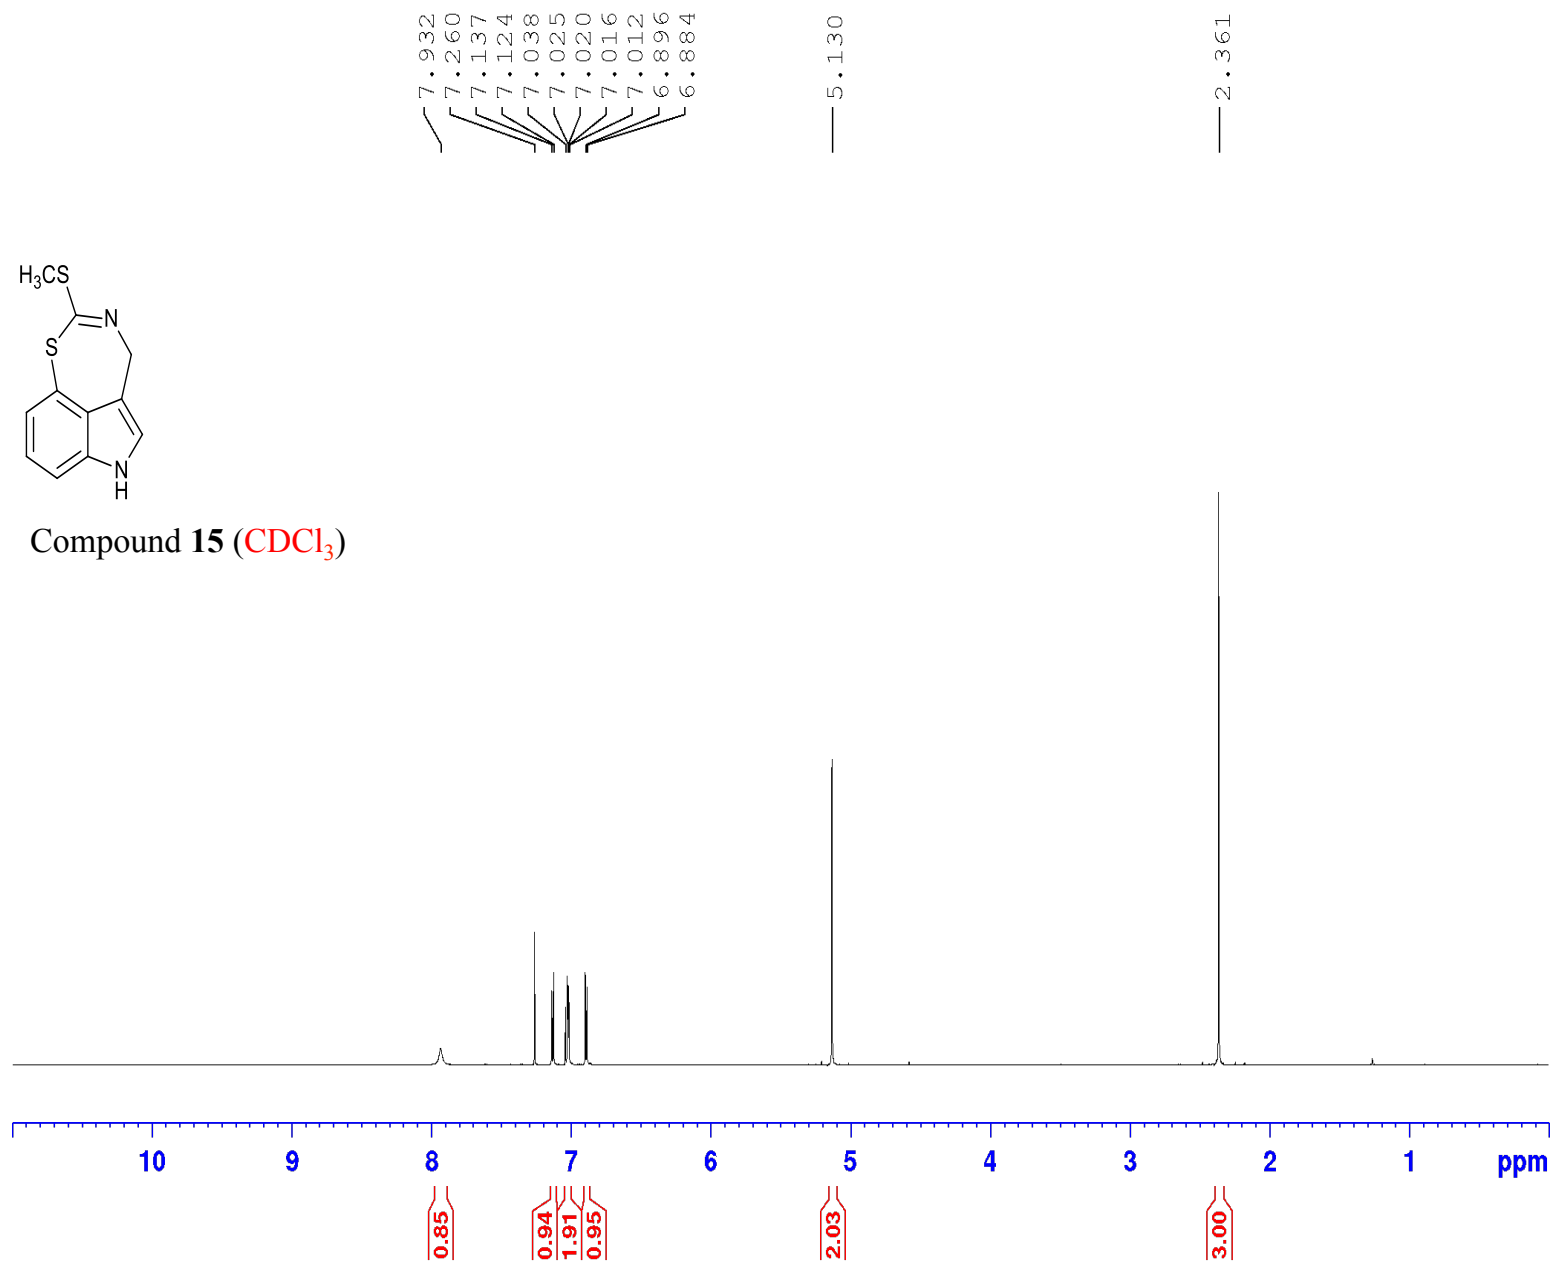

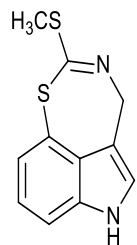

Compound **15** (expansion)

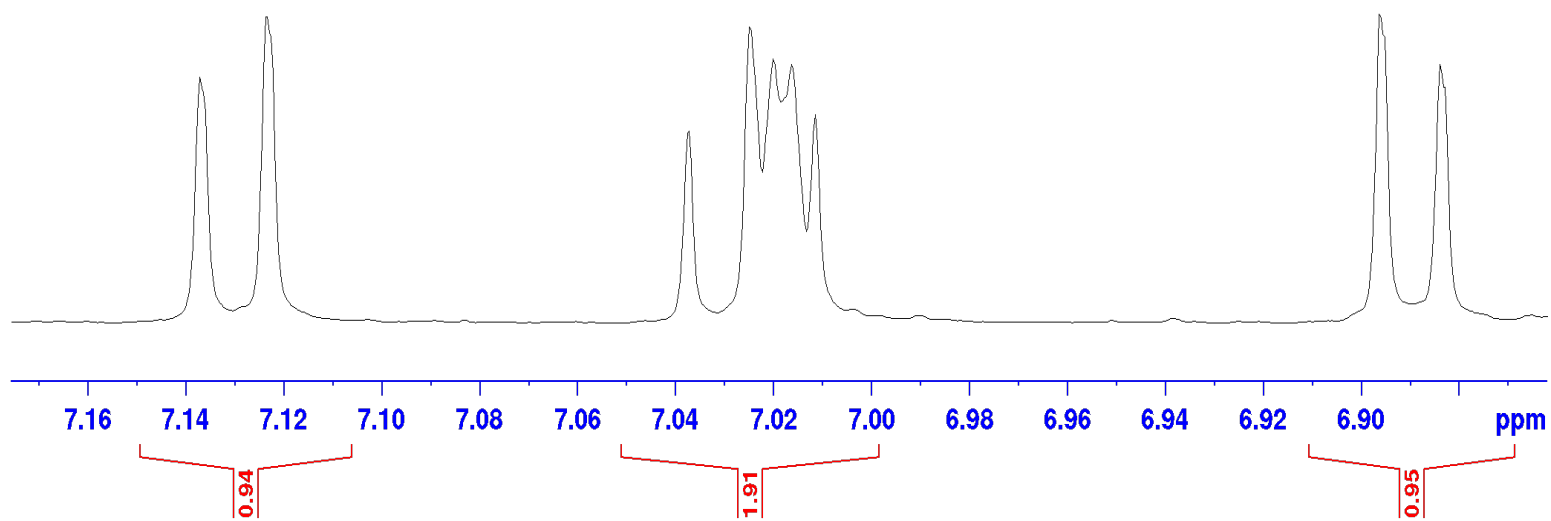



Compound **15** ( $\text{CDCl}_3$ )

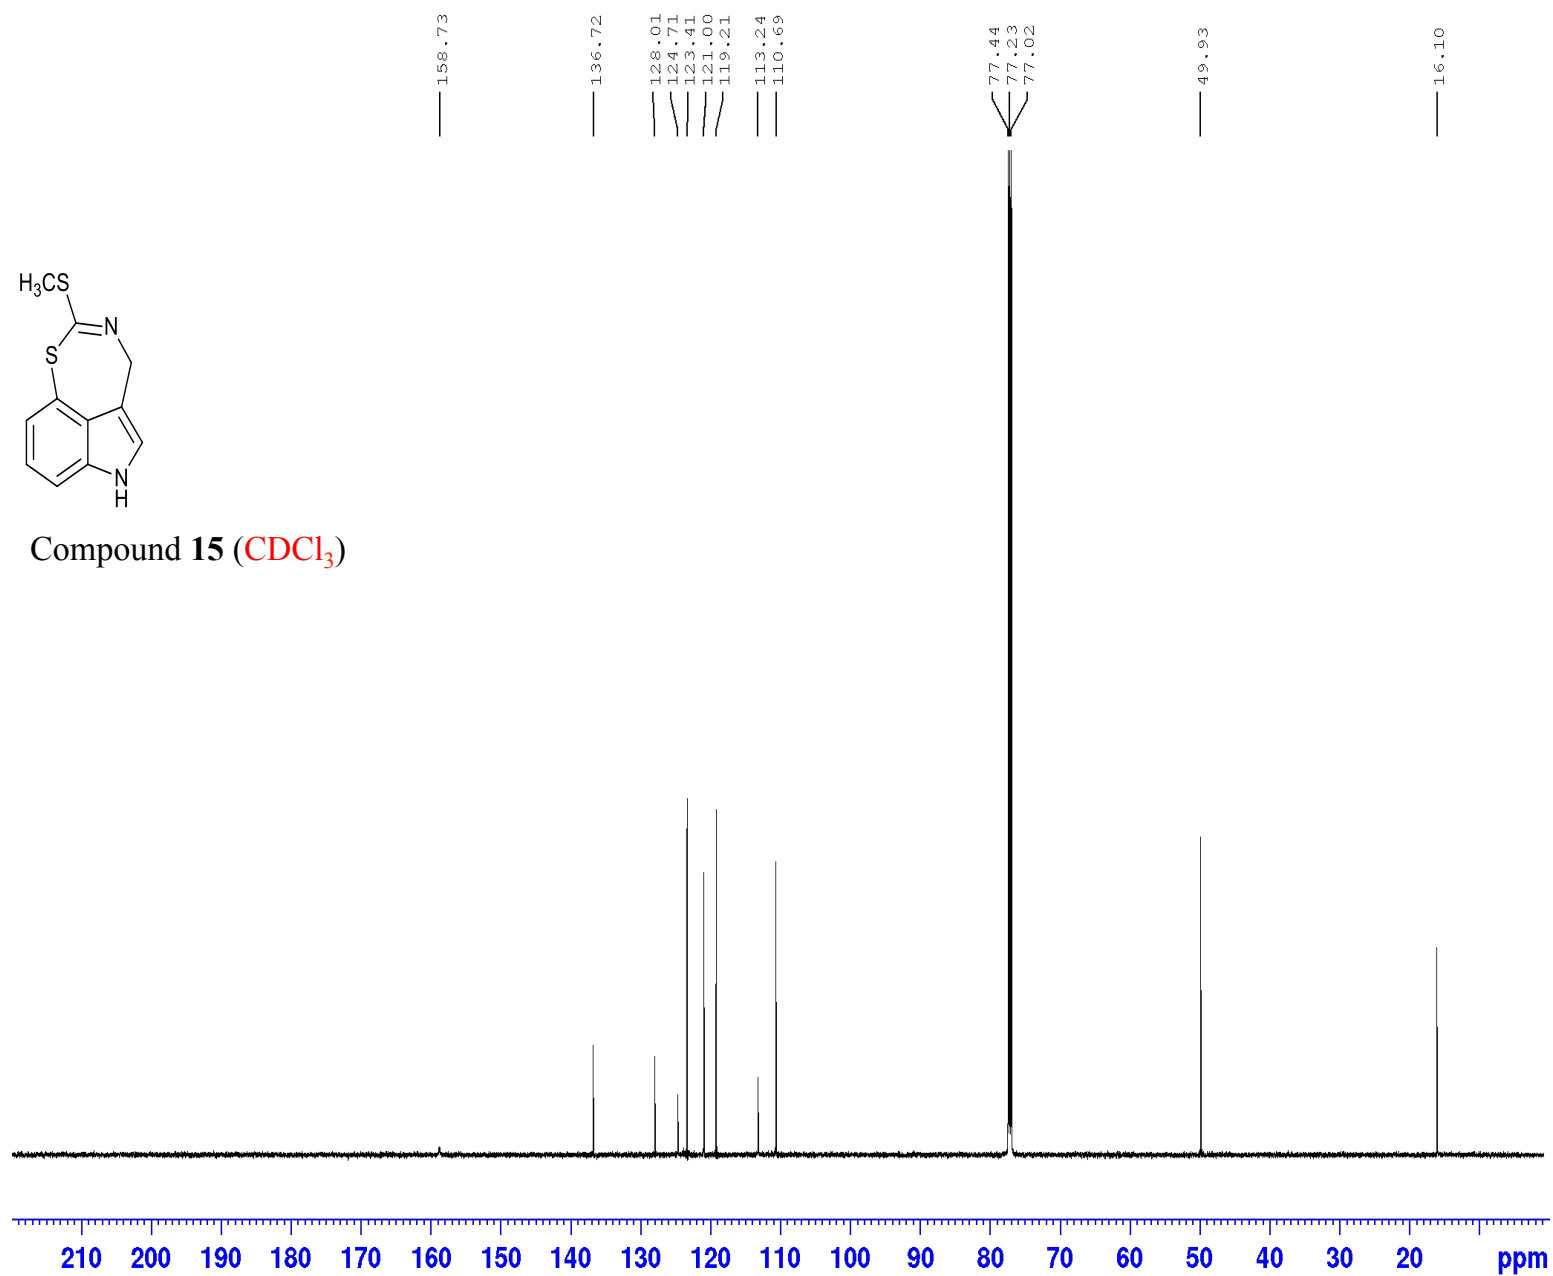

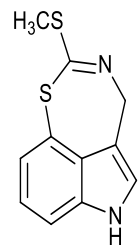

Compound **15** (expansion)

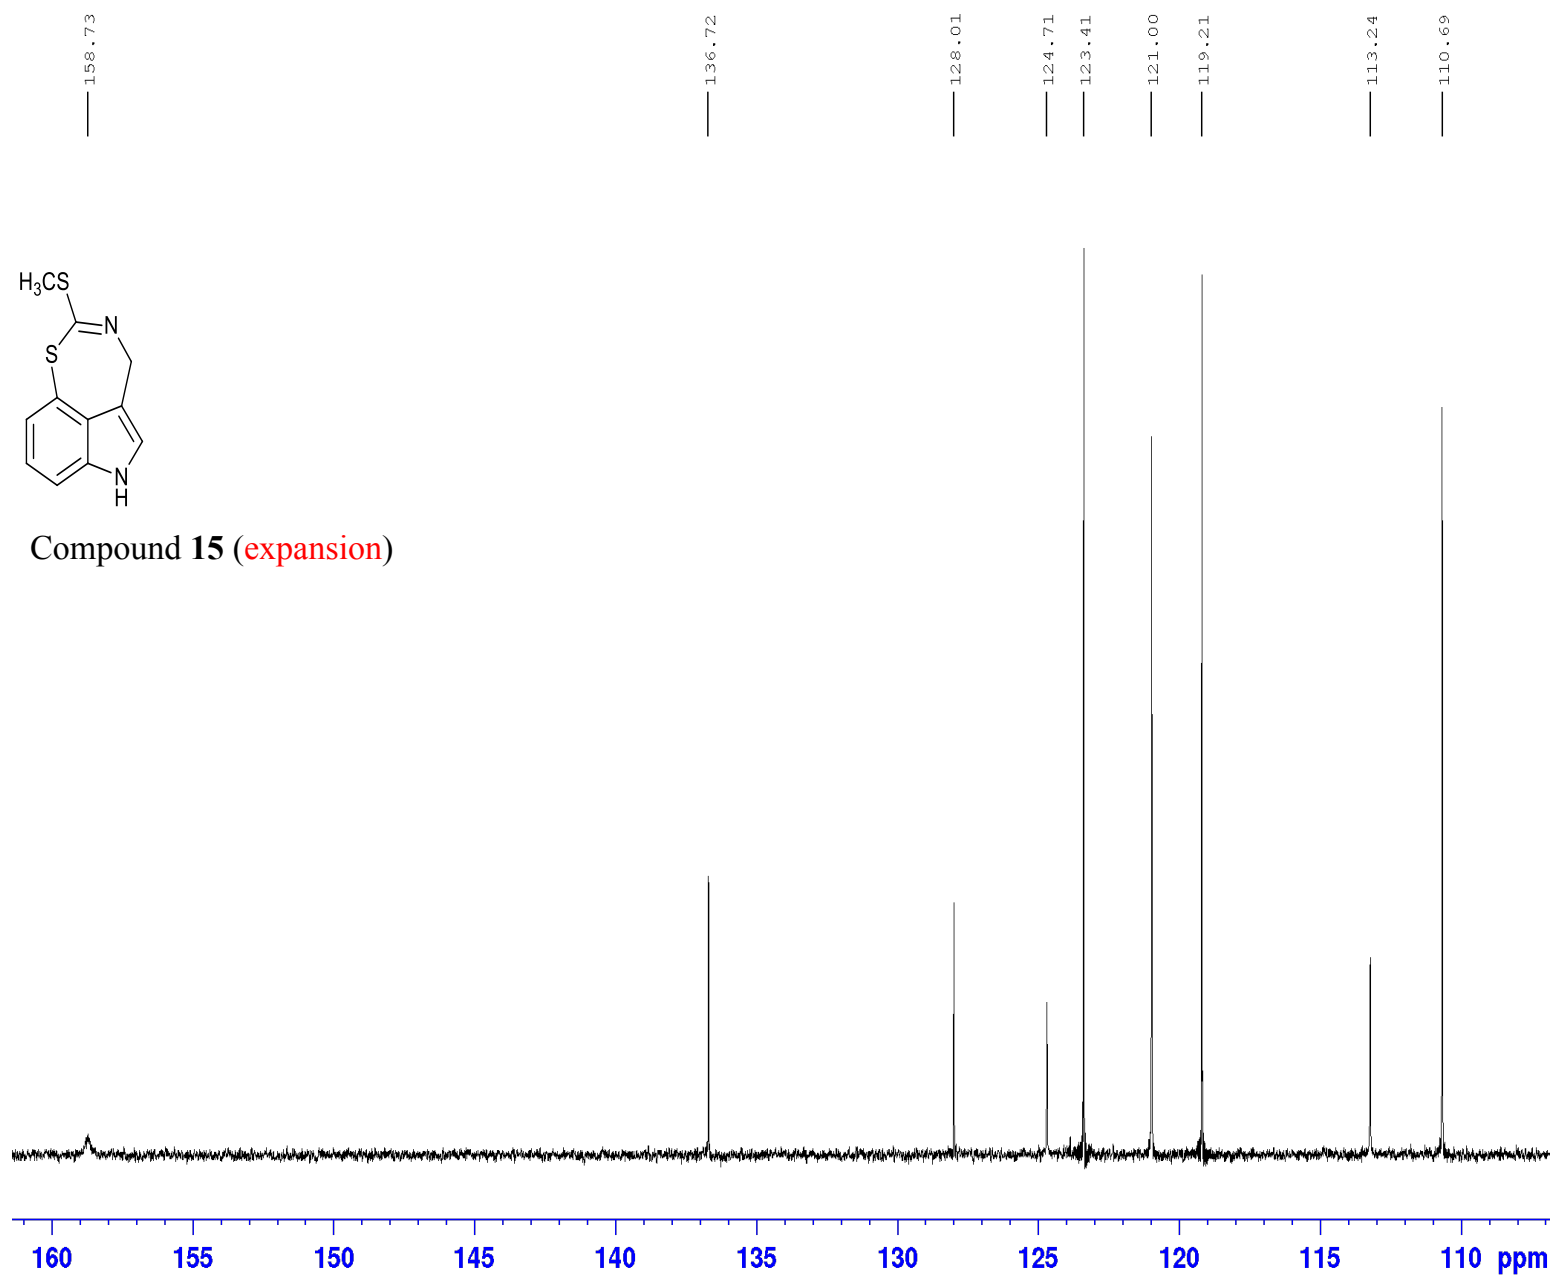



Compound **15** (COSY)

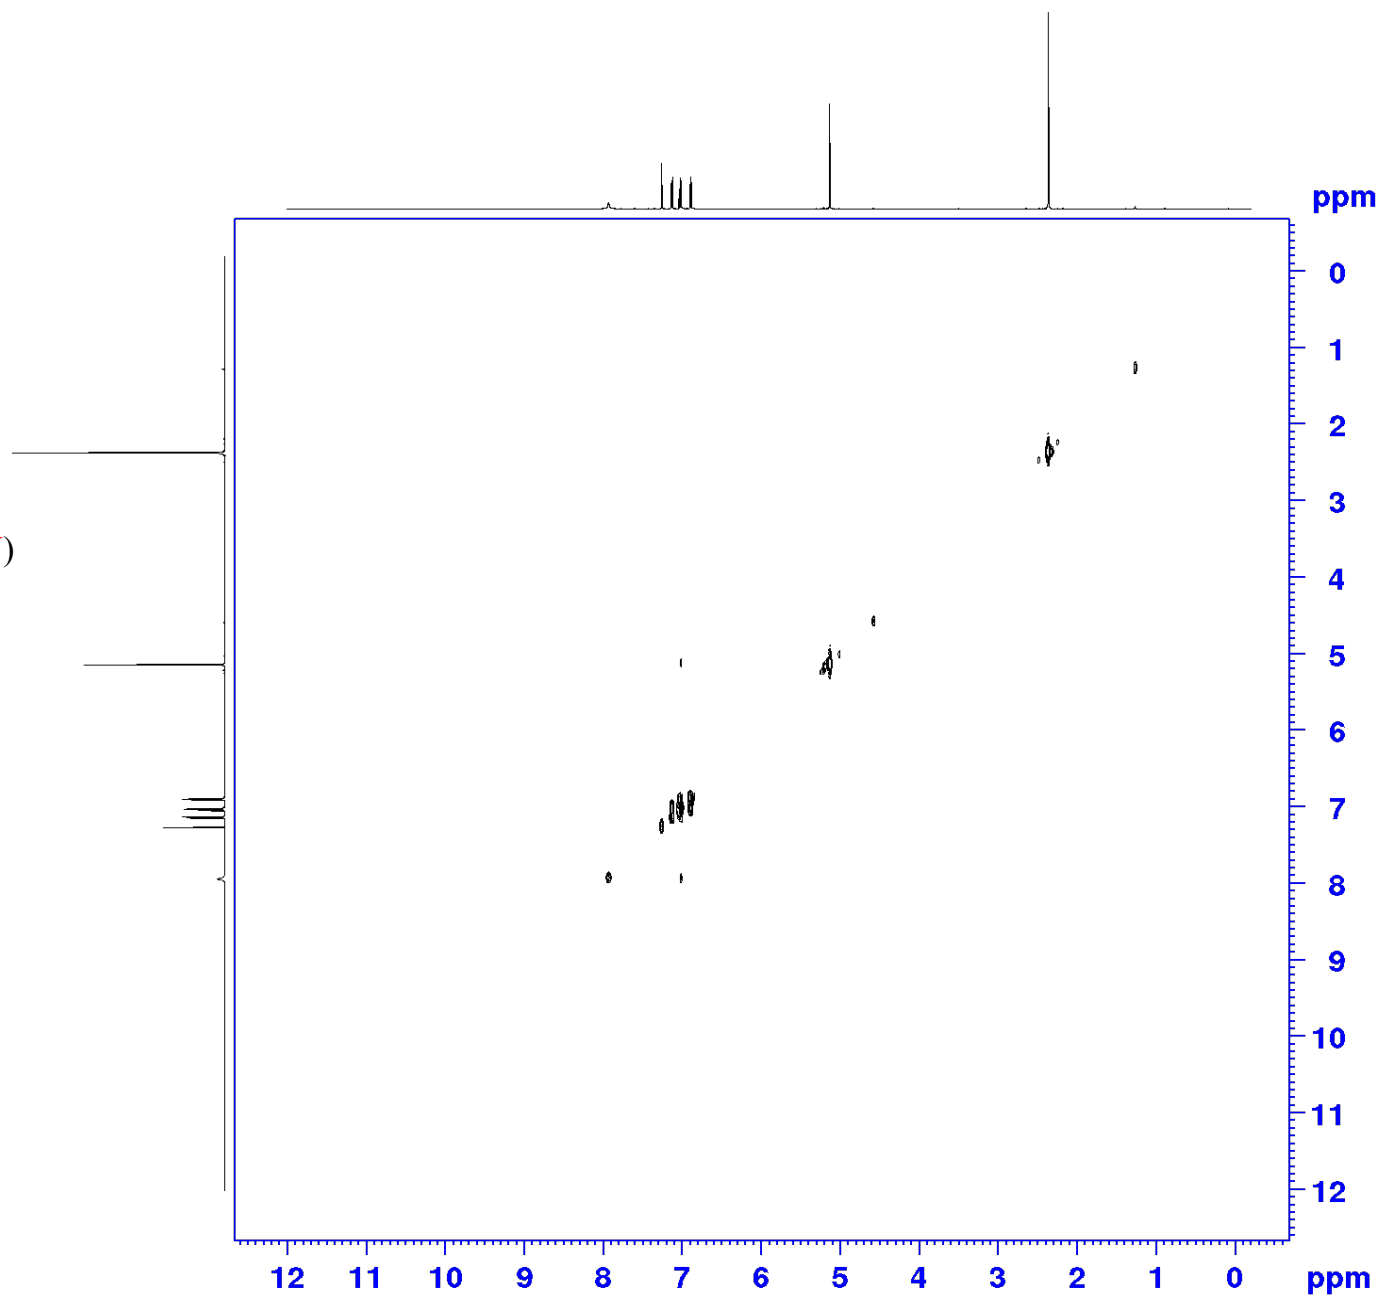



Compound **15** (COSY)

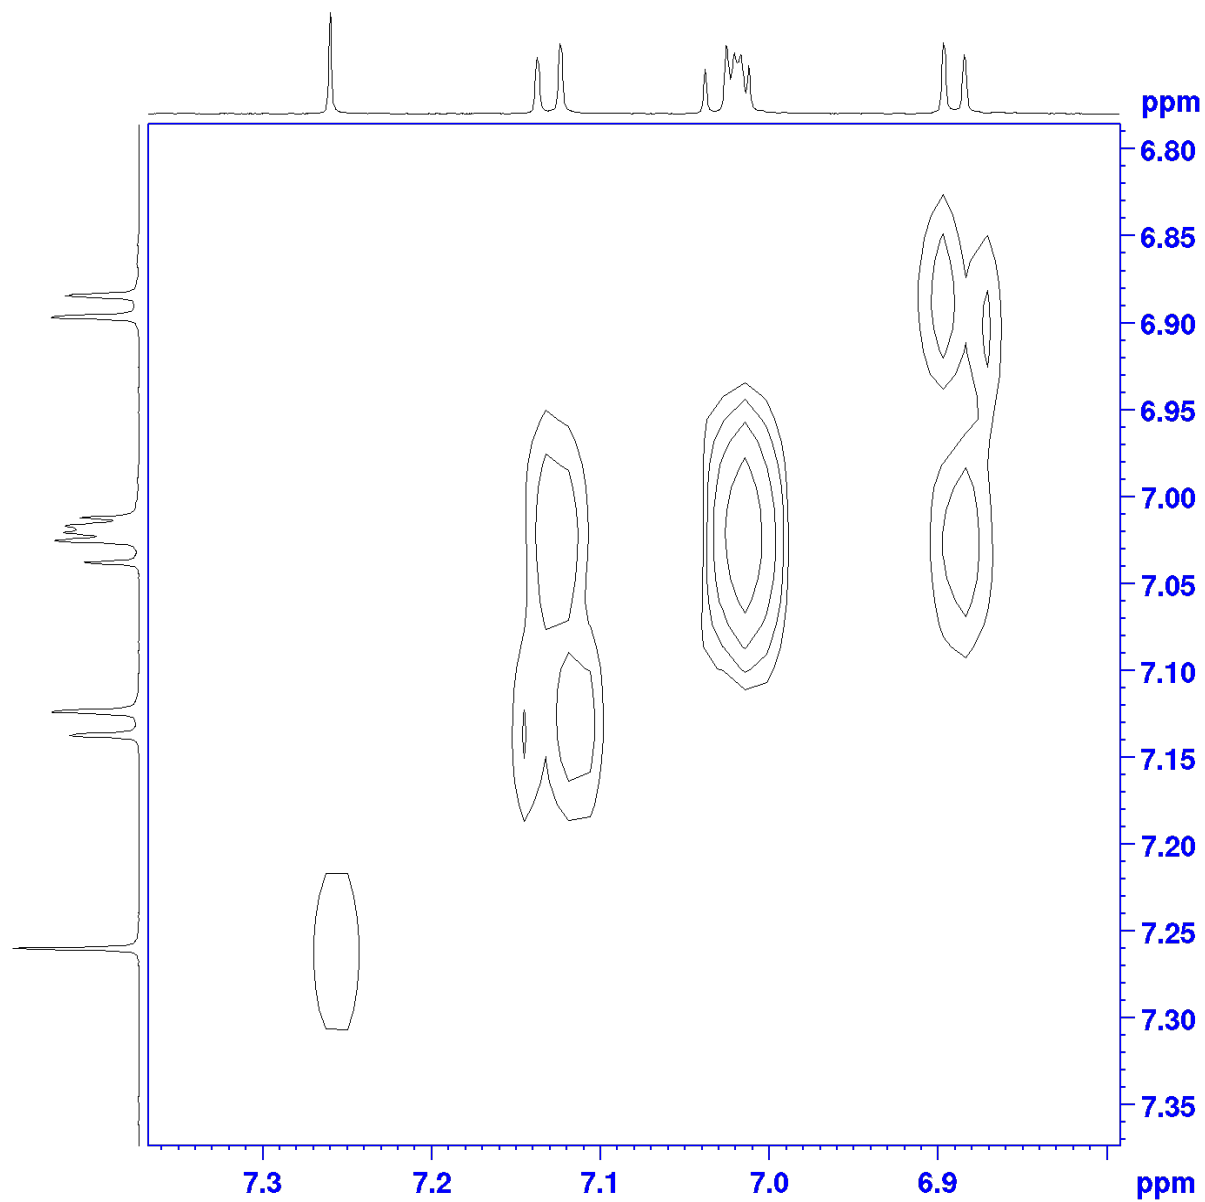



Compound **15** (HMQC)

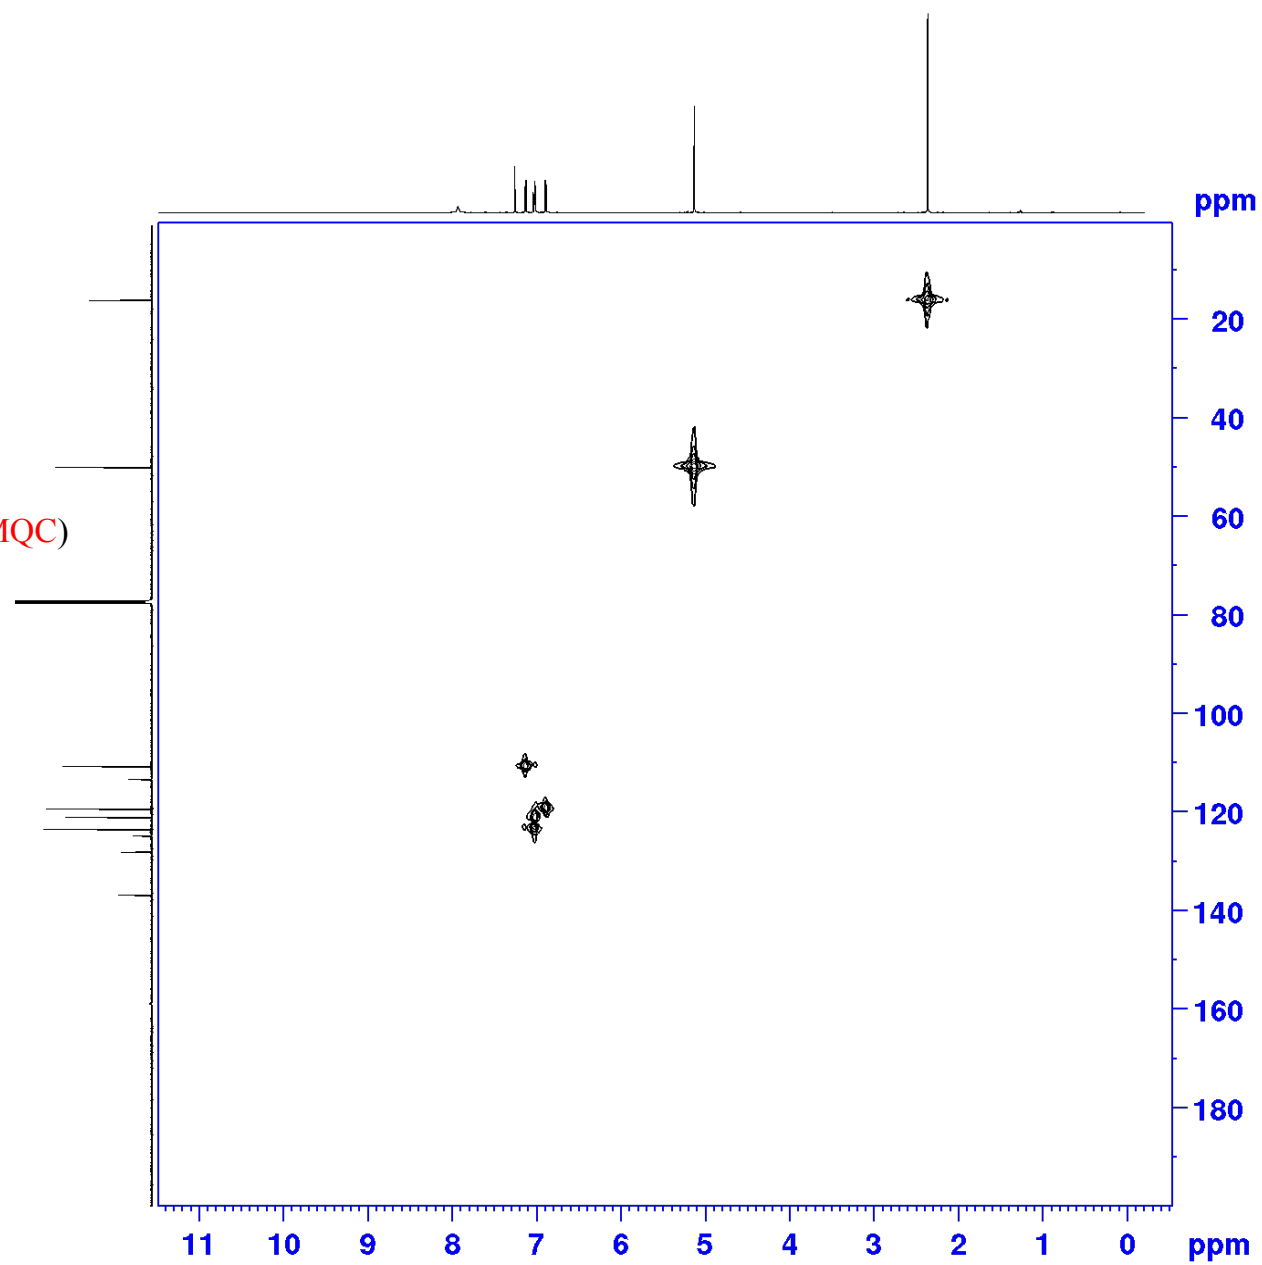

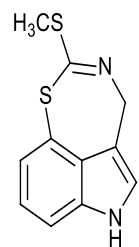

Compound **15** (HMQC)

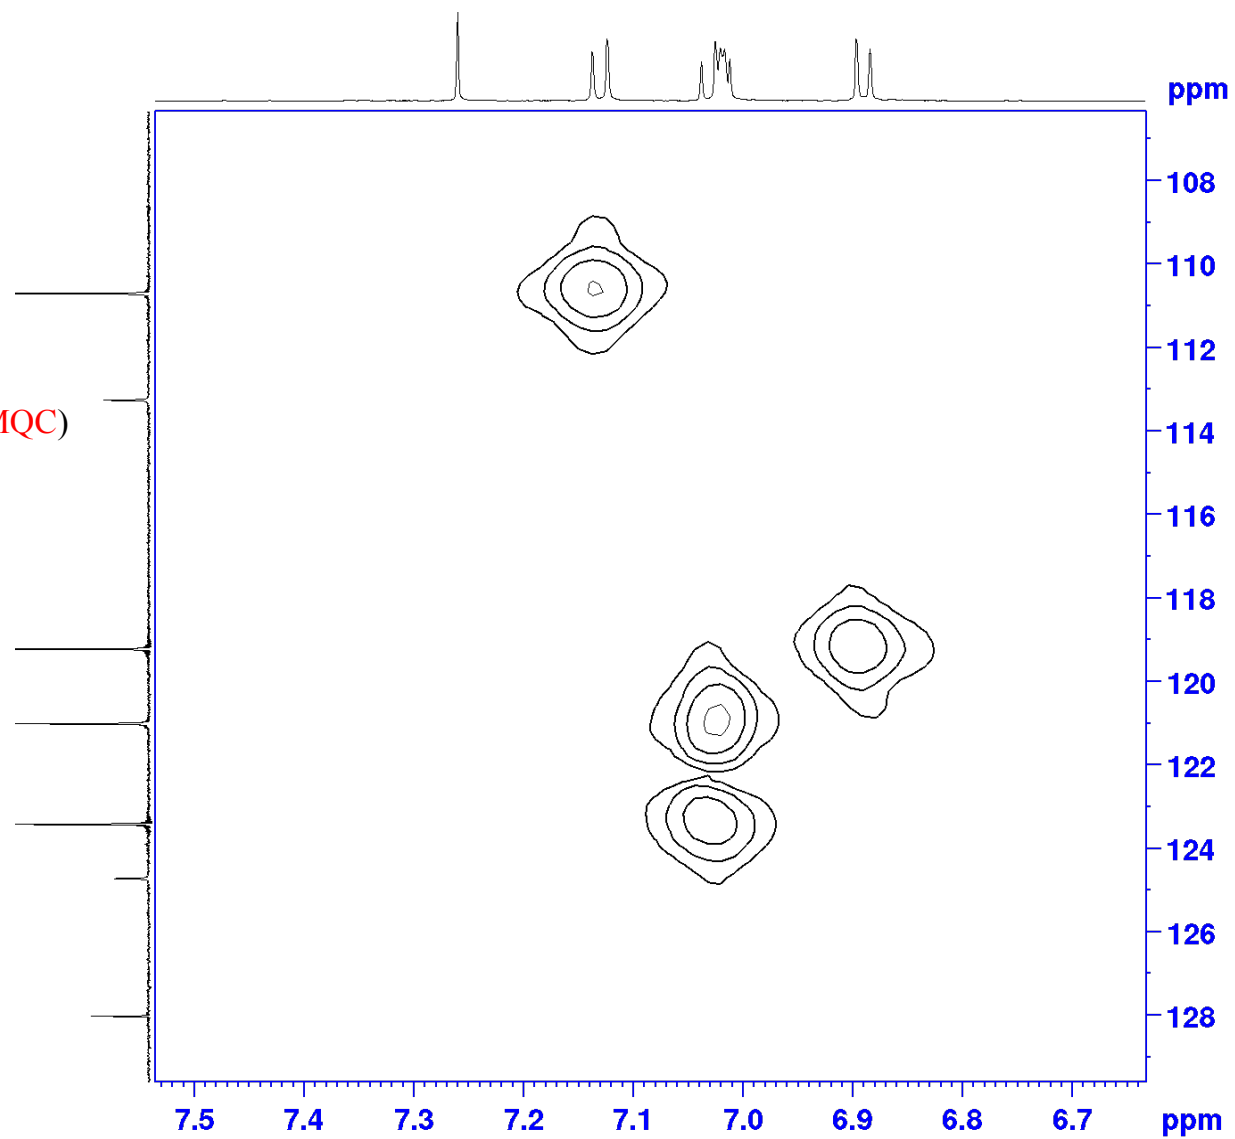



Compound **15** (HMBC)

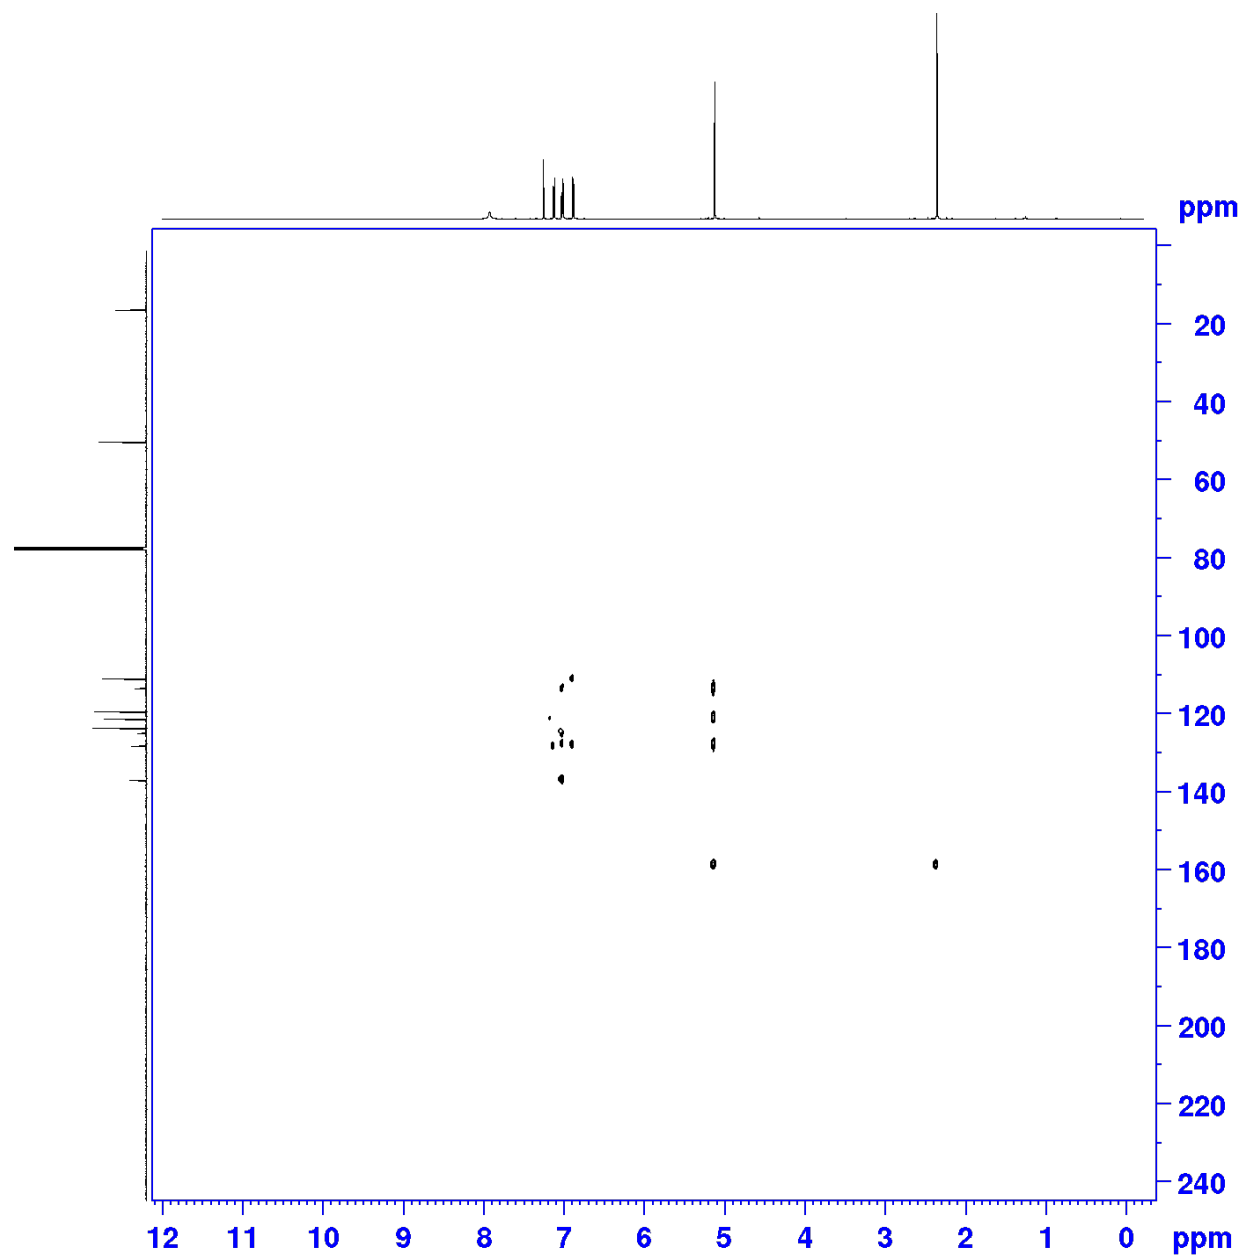



Compound **15** (HMBC)

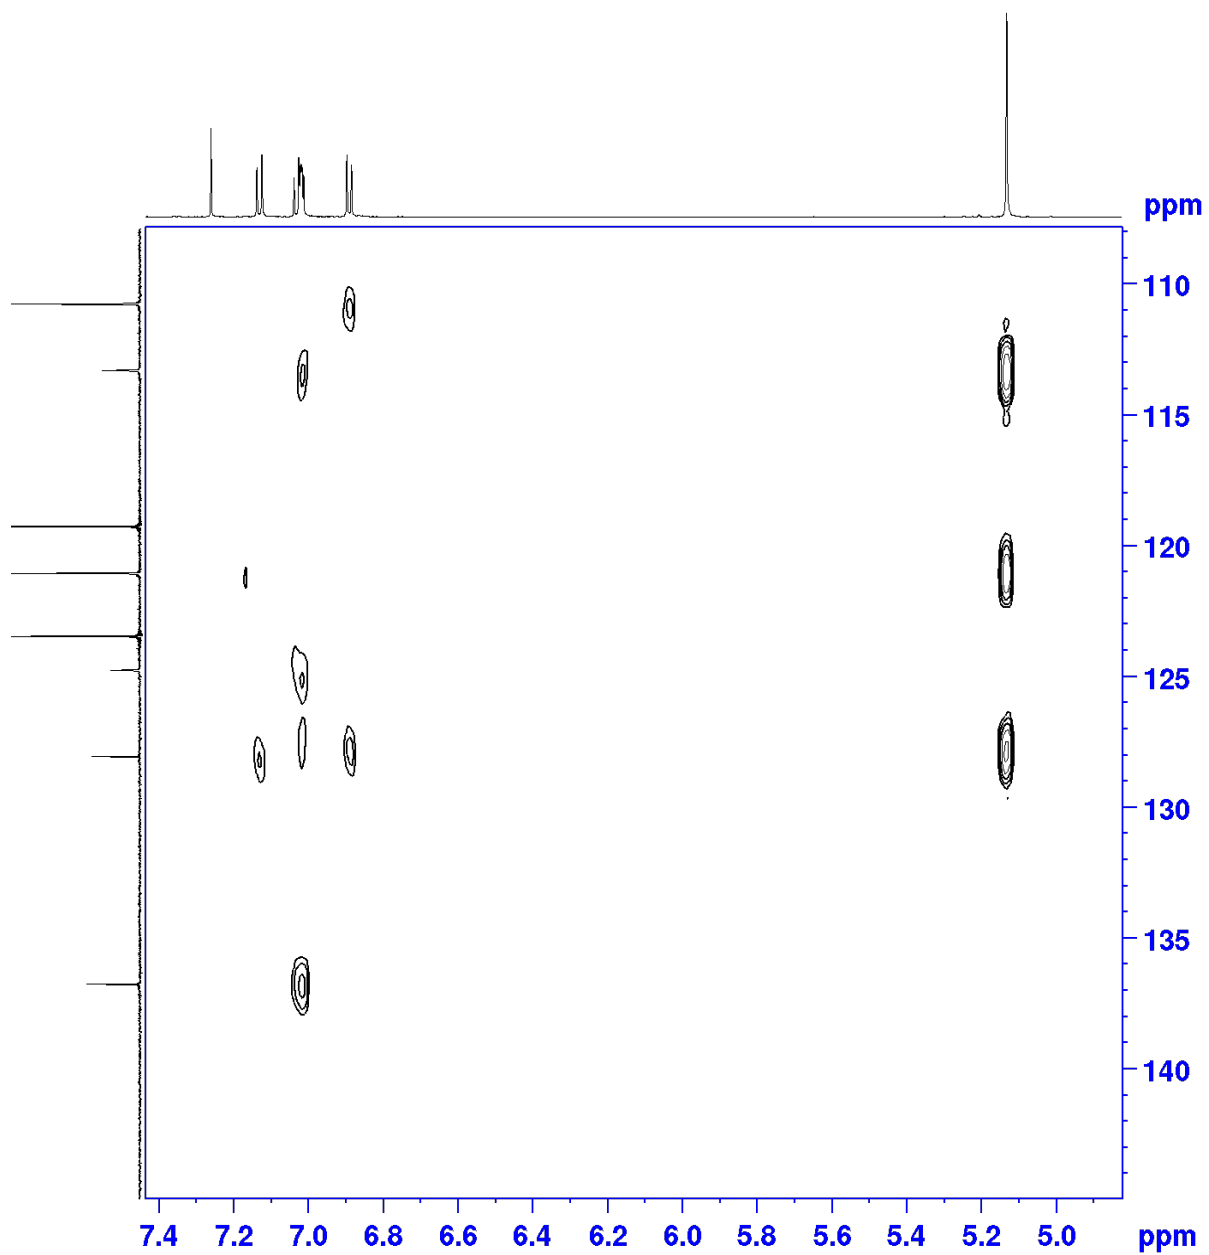

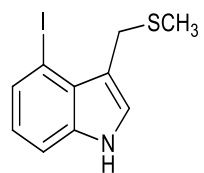

Compound **22** ( $\text{CDCl}_3$ )

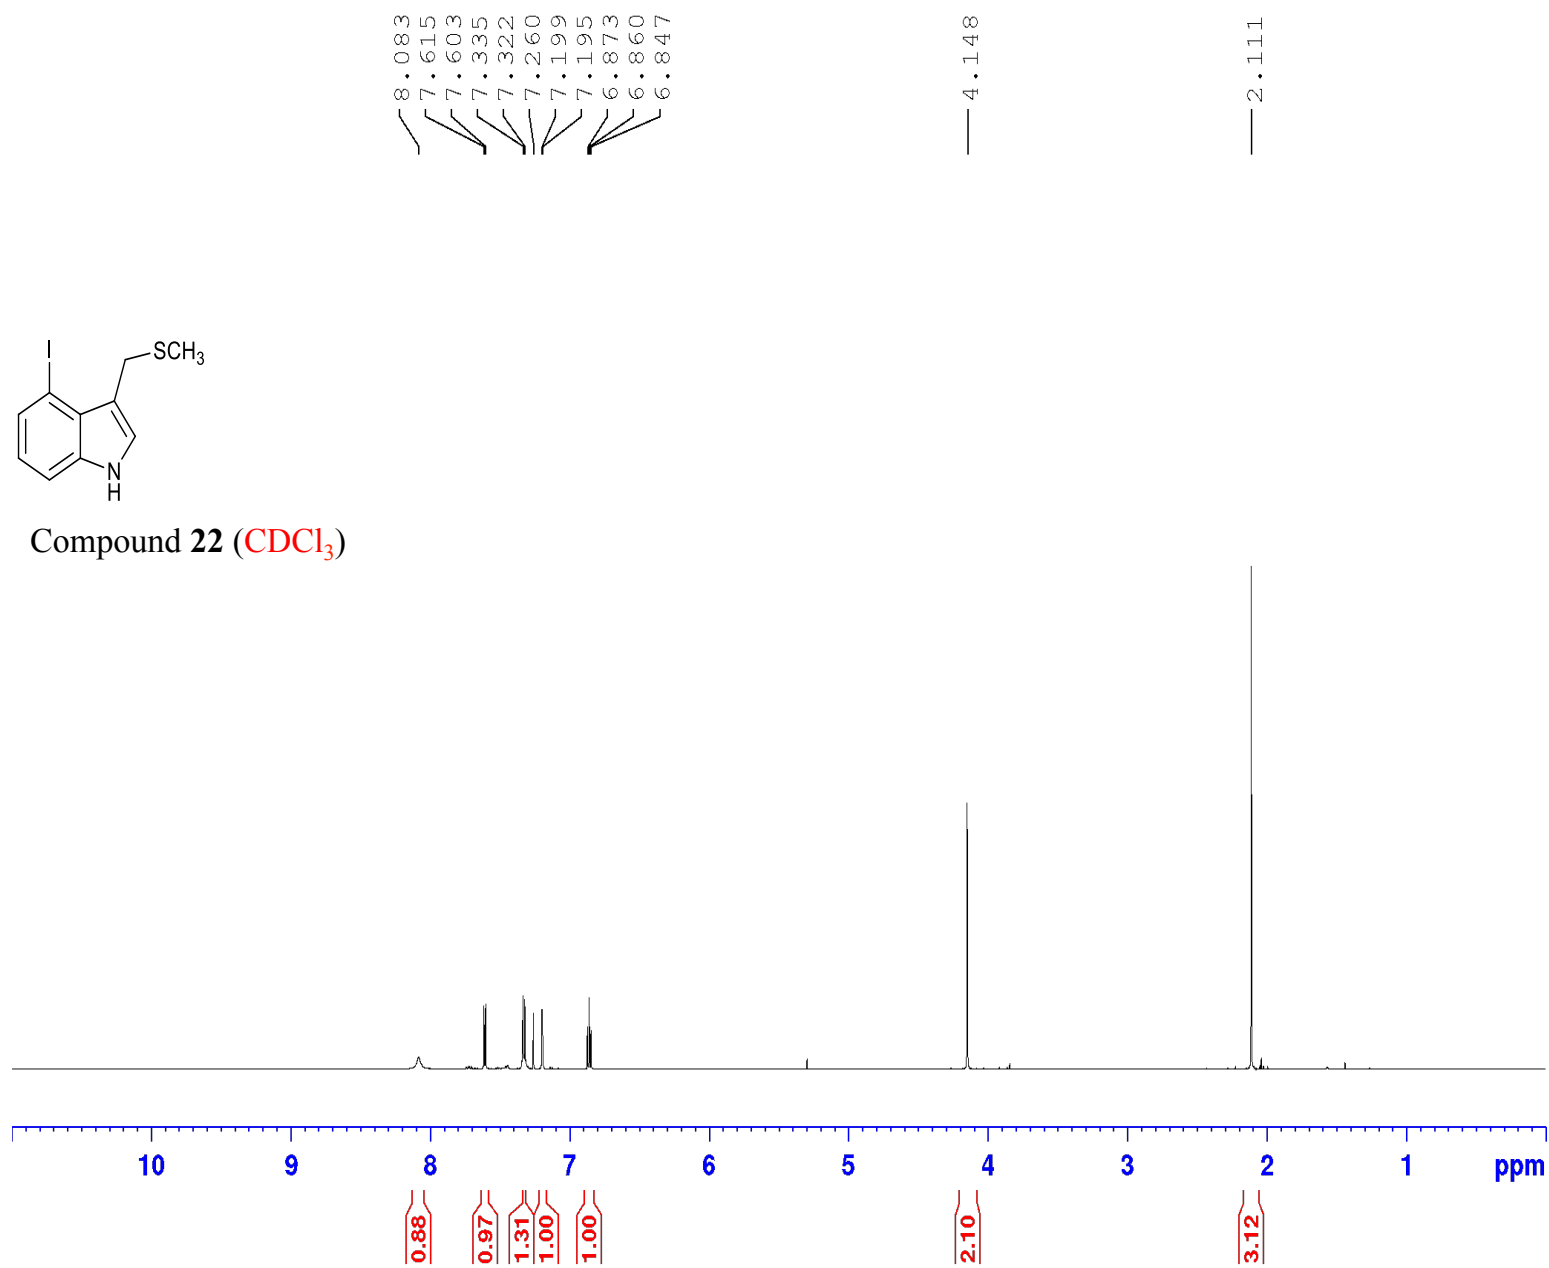

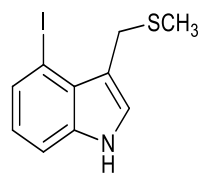

Compound 22 (expansion)

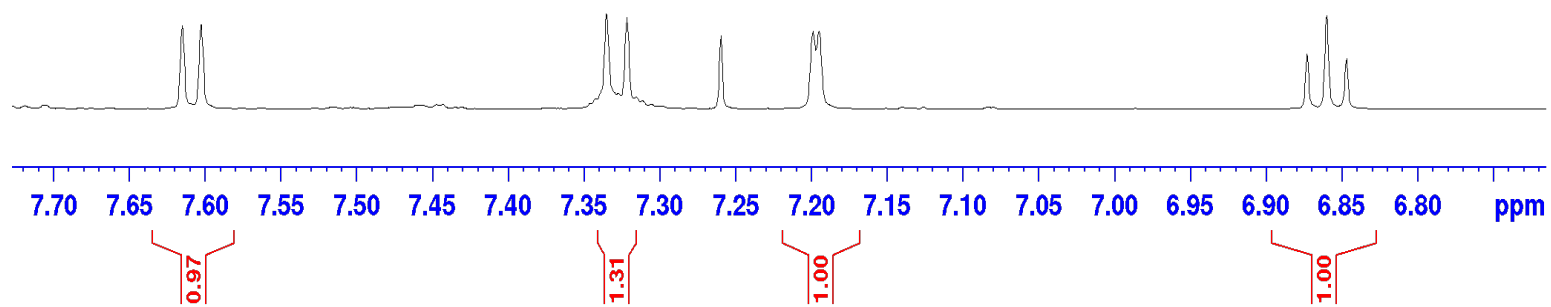

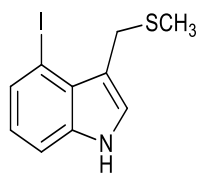

Compound 22 ( $\text{CDCl}_3$ )

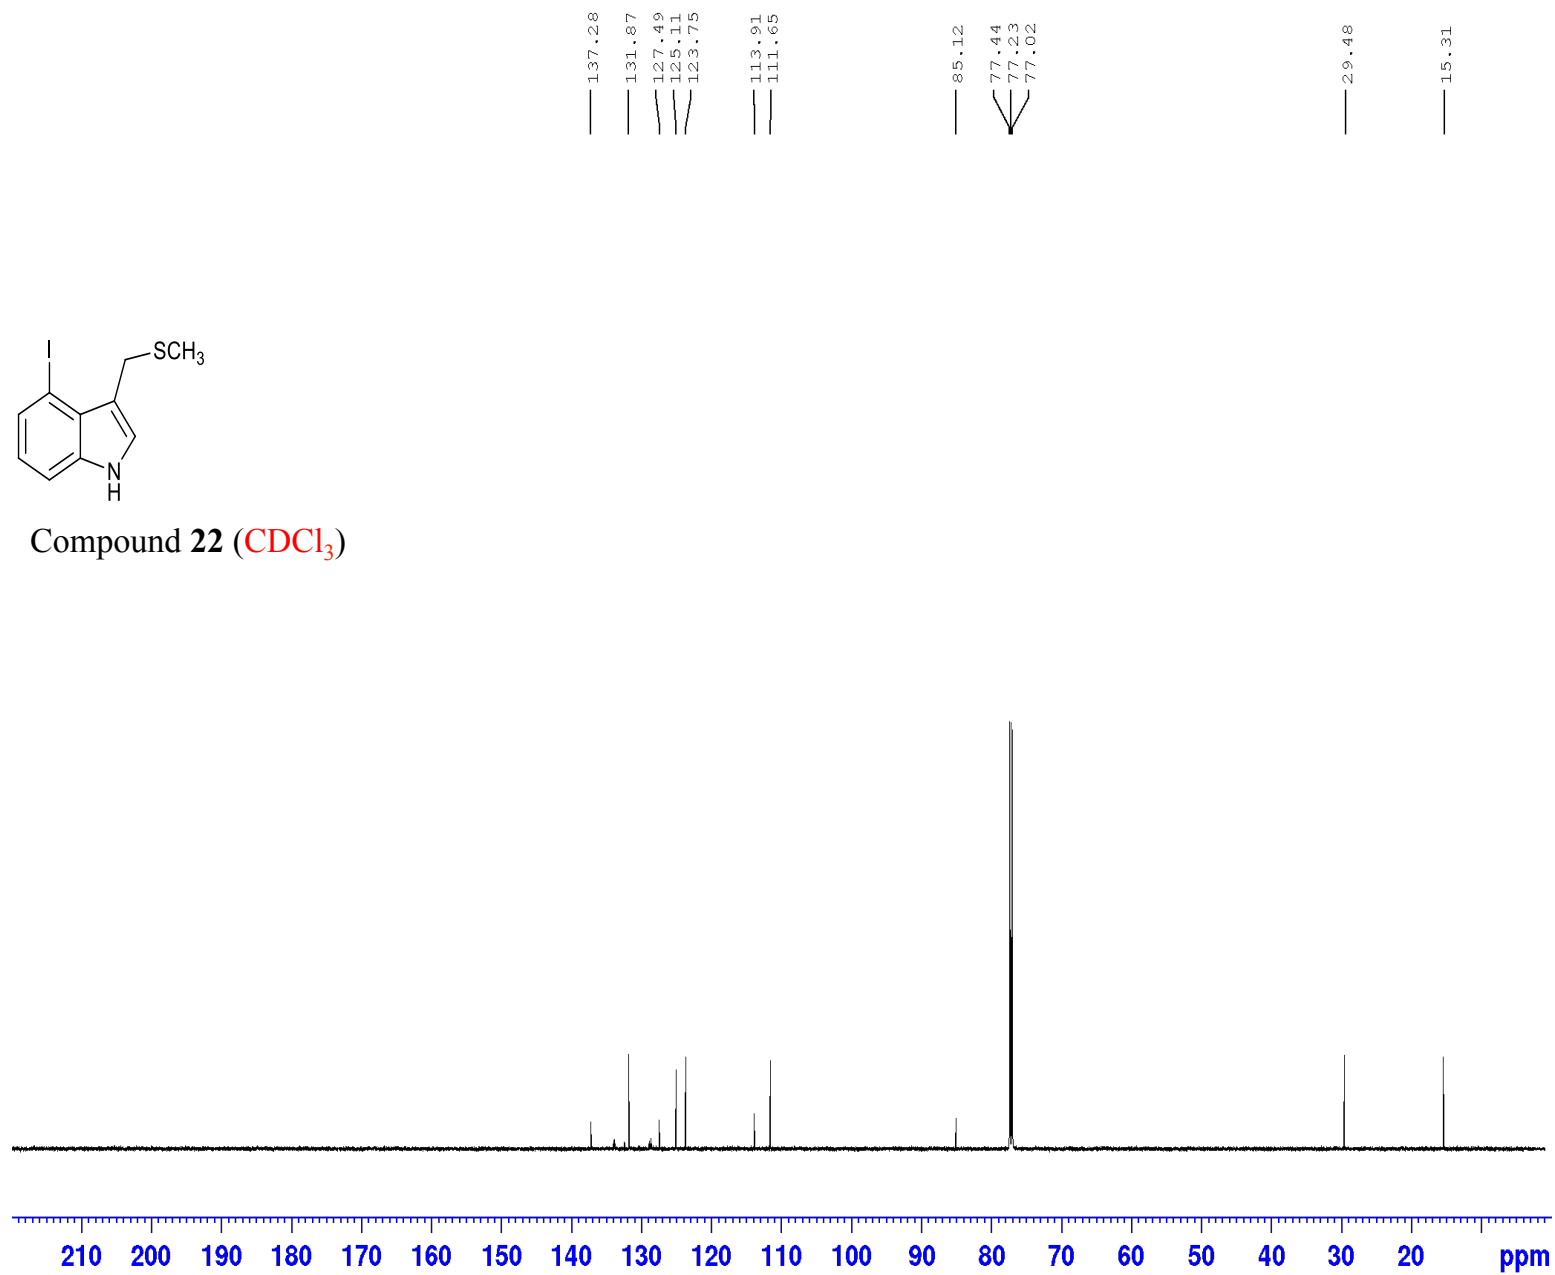

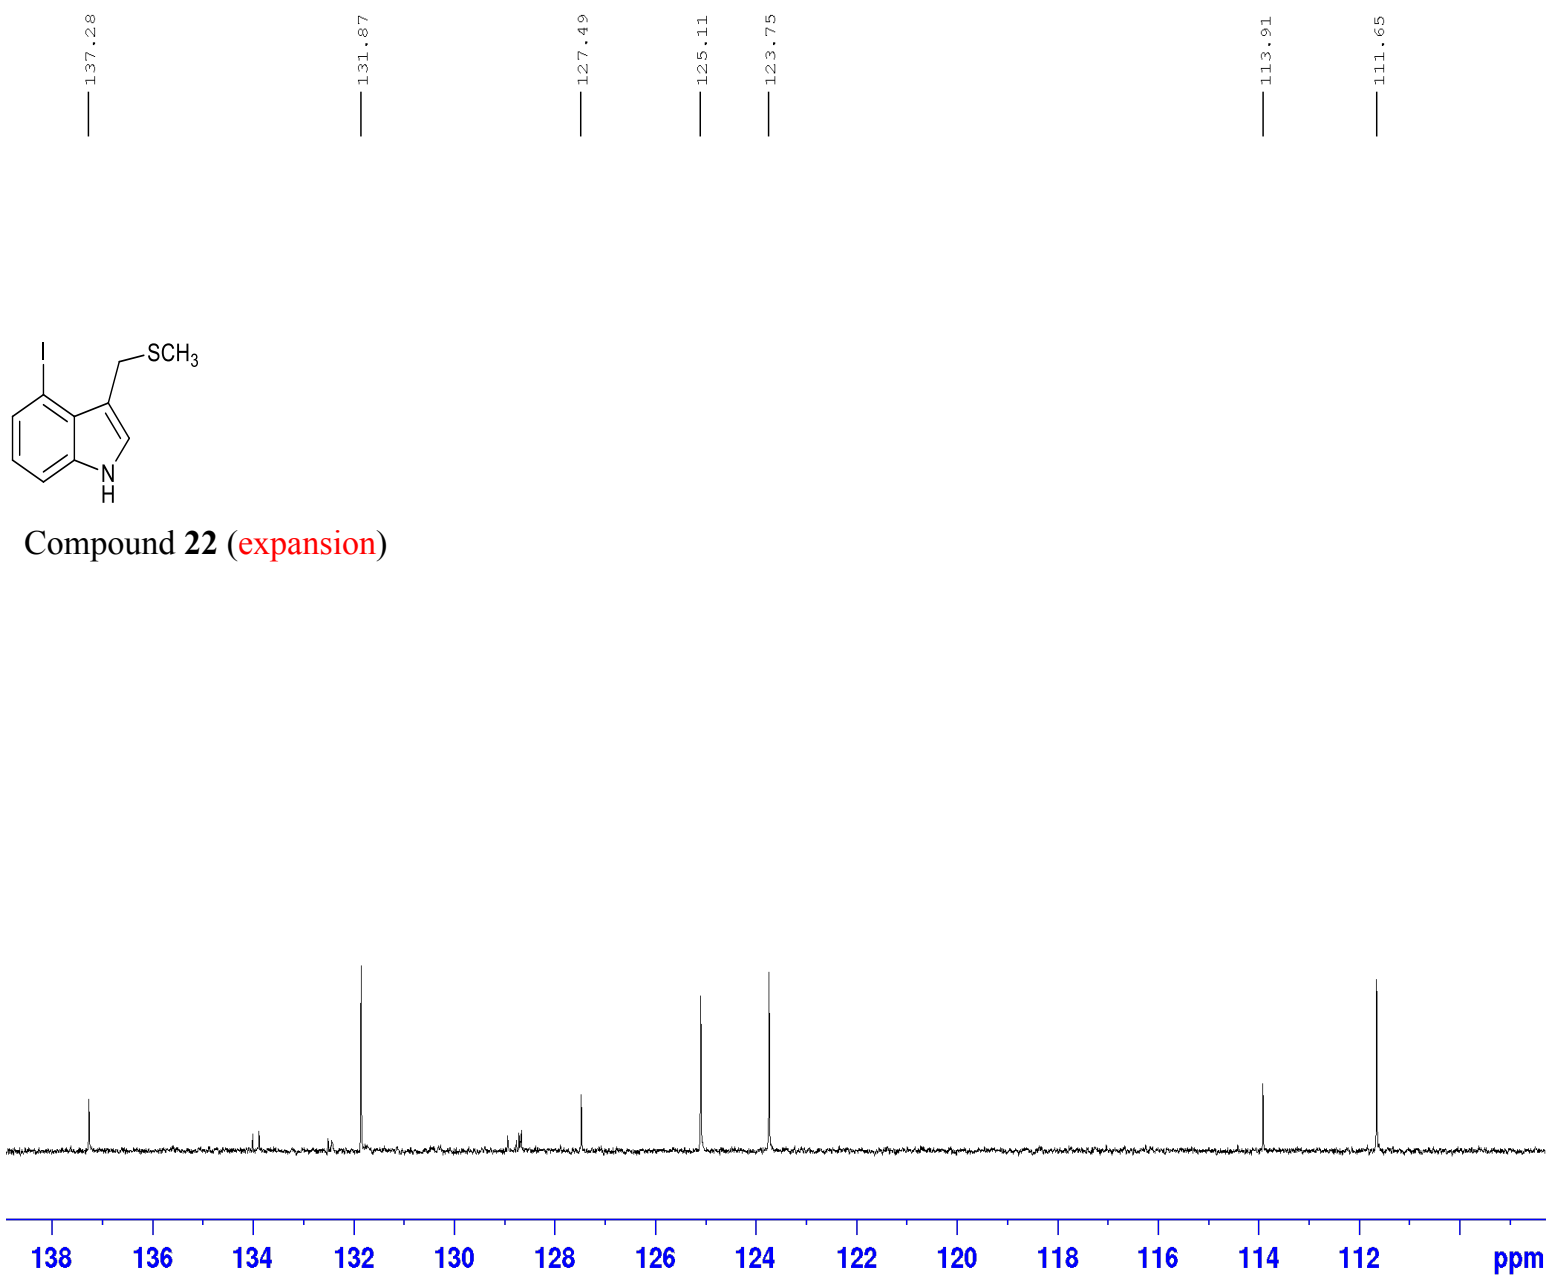

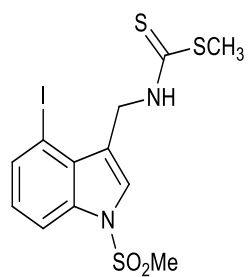

Compound **21** ( $\text{CDCl}_3$ )

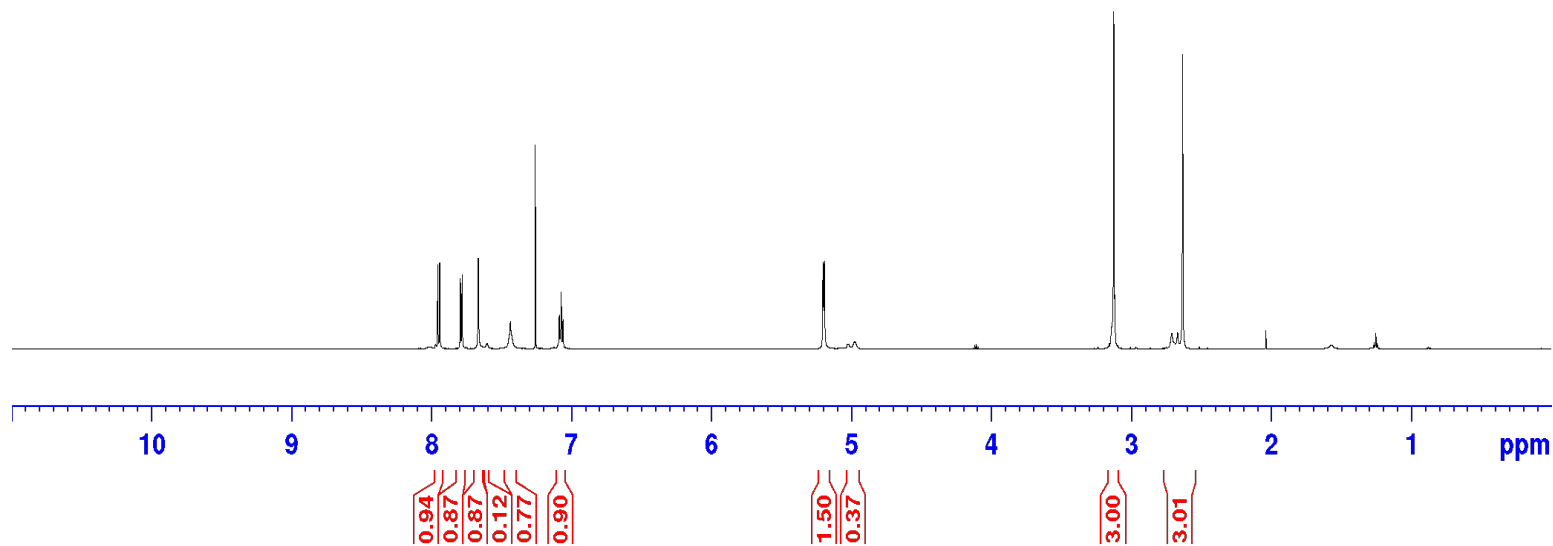

7.958  
7.957  
7.944  
7.943  
7.796  
7.783  
7.668  
7.439  
7.260  
7.089  
7.076  
7.062

5.204  
5.195

3.126

2.635



Compound **21** (expansion)

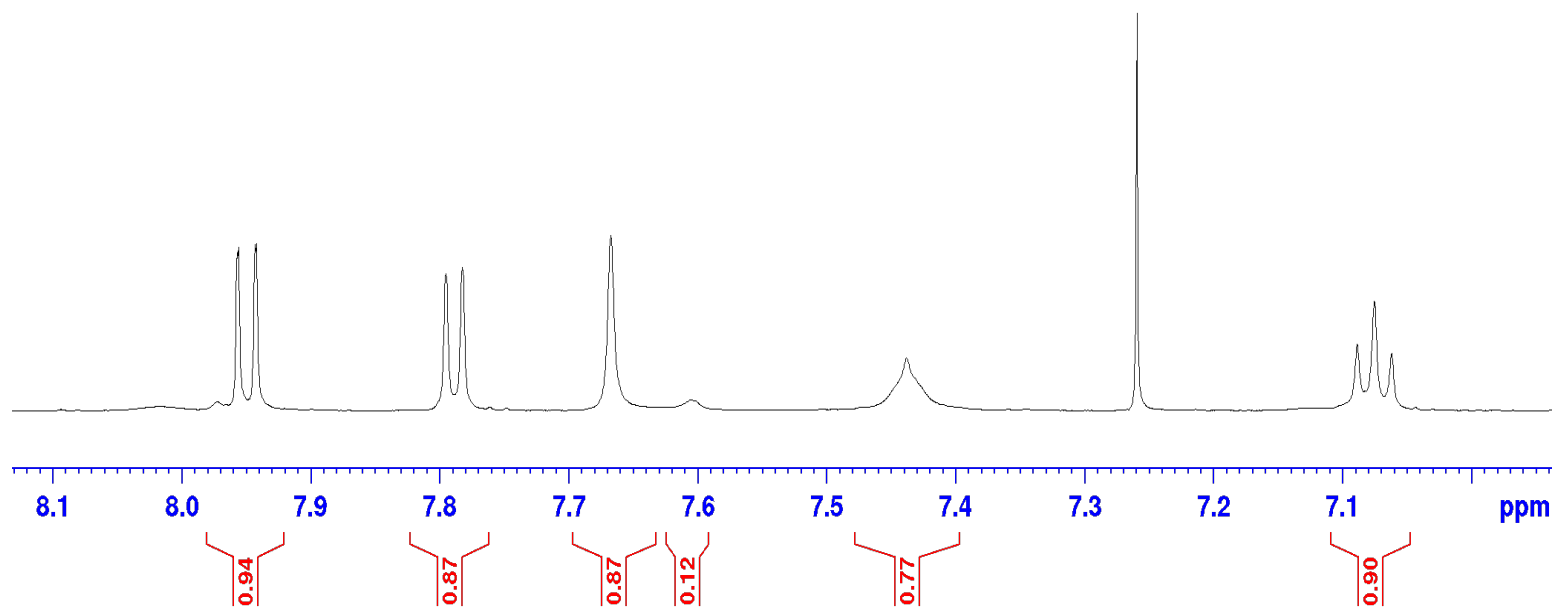



Compound **21** ( $\text{CDCl}_3$ )

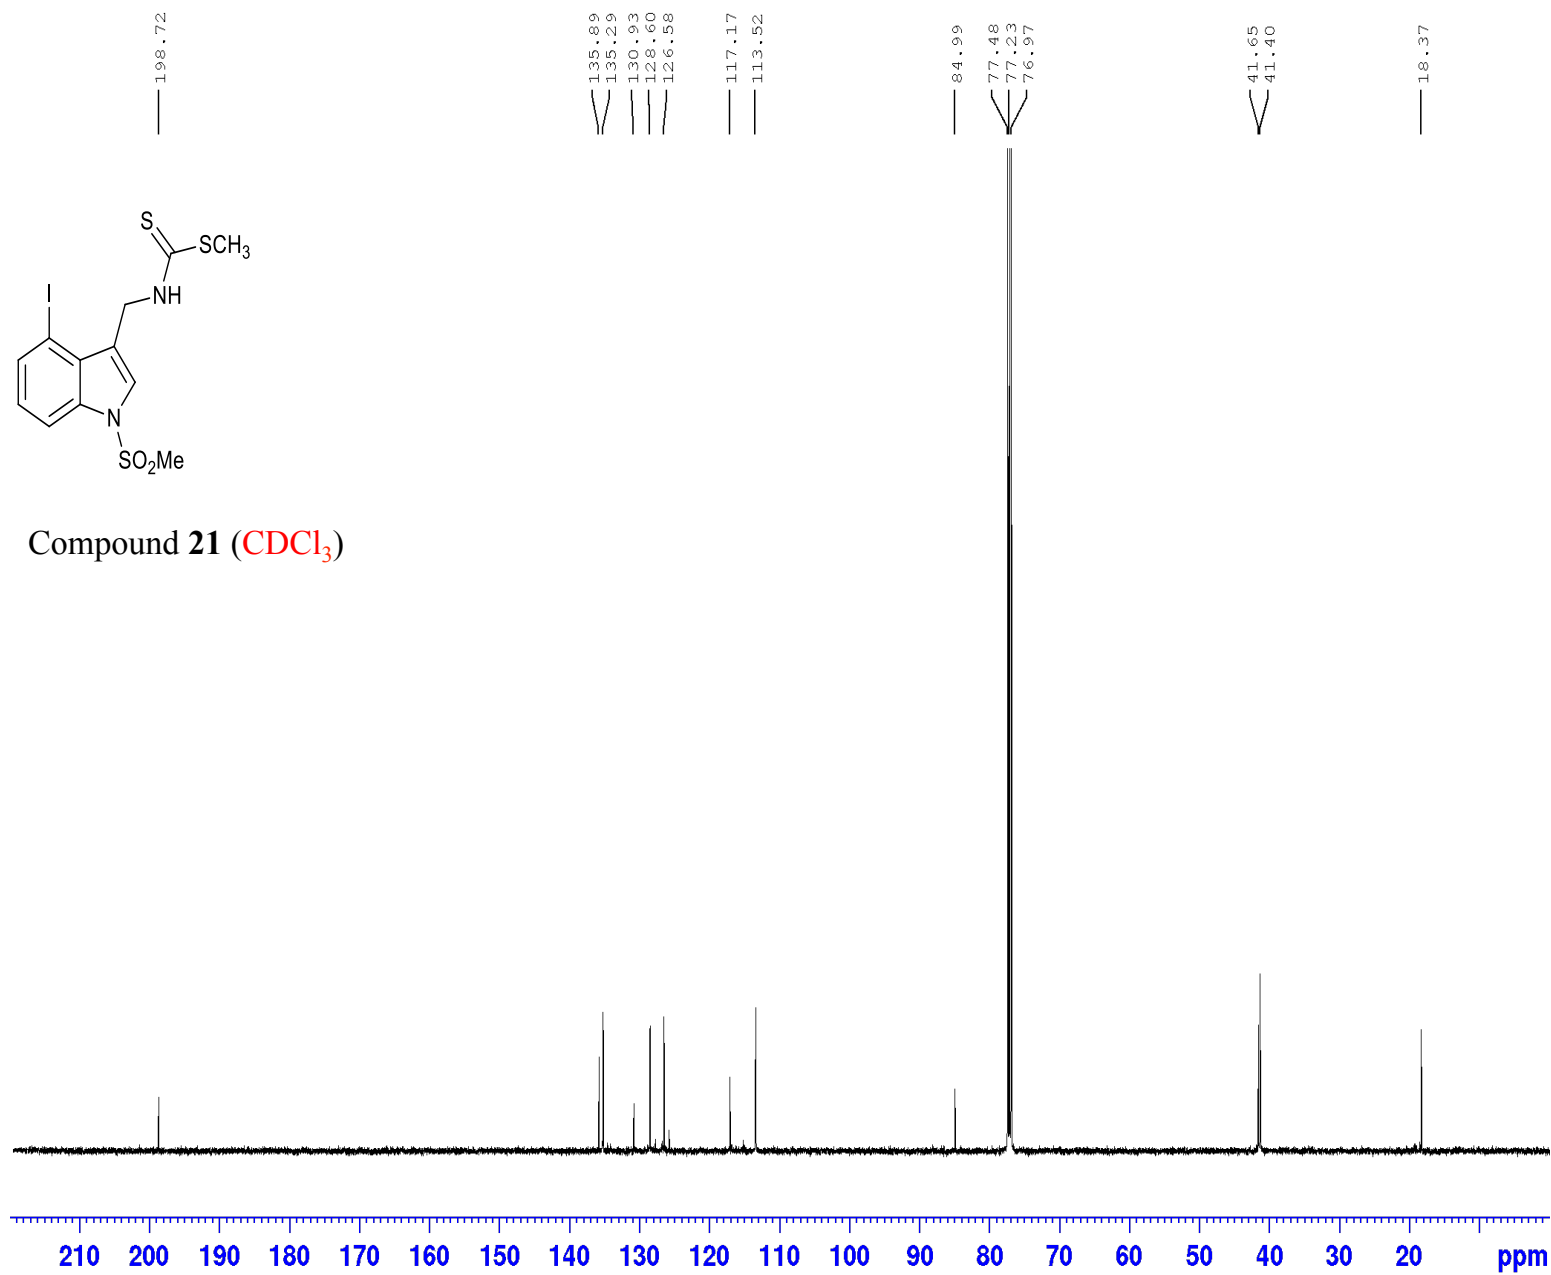

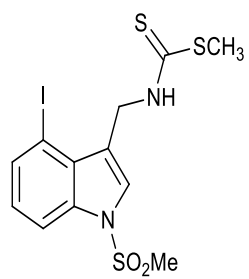

Compound **21** (expansion)

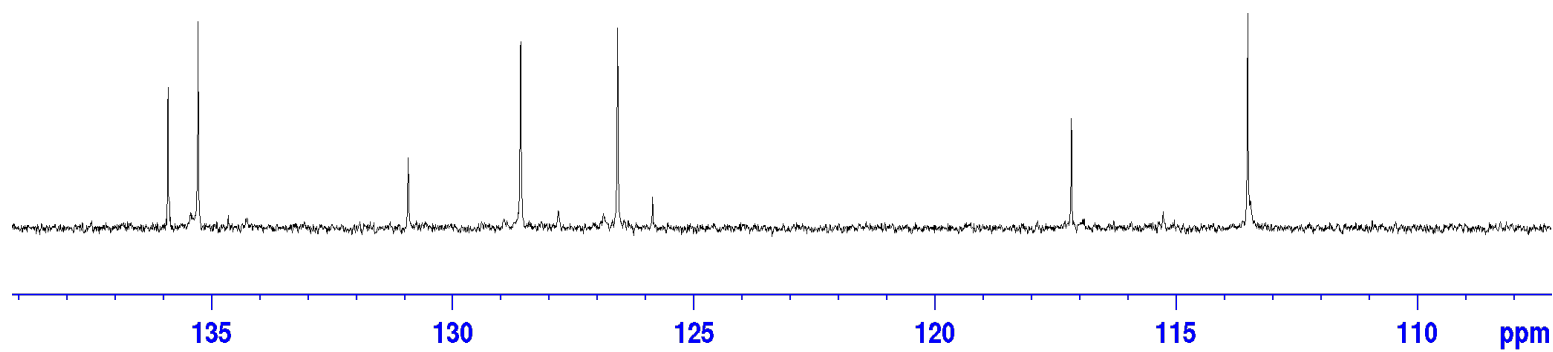

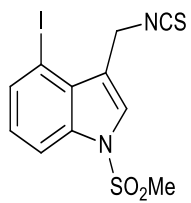

Compound **24** ( $\text{CDCl}_3$ )

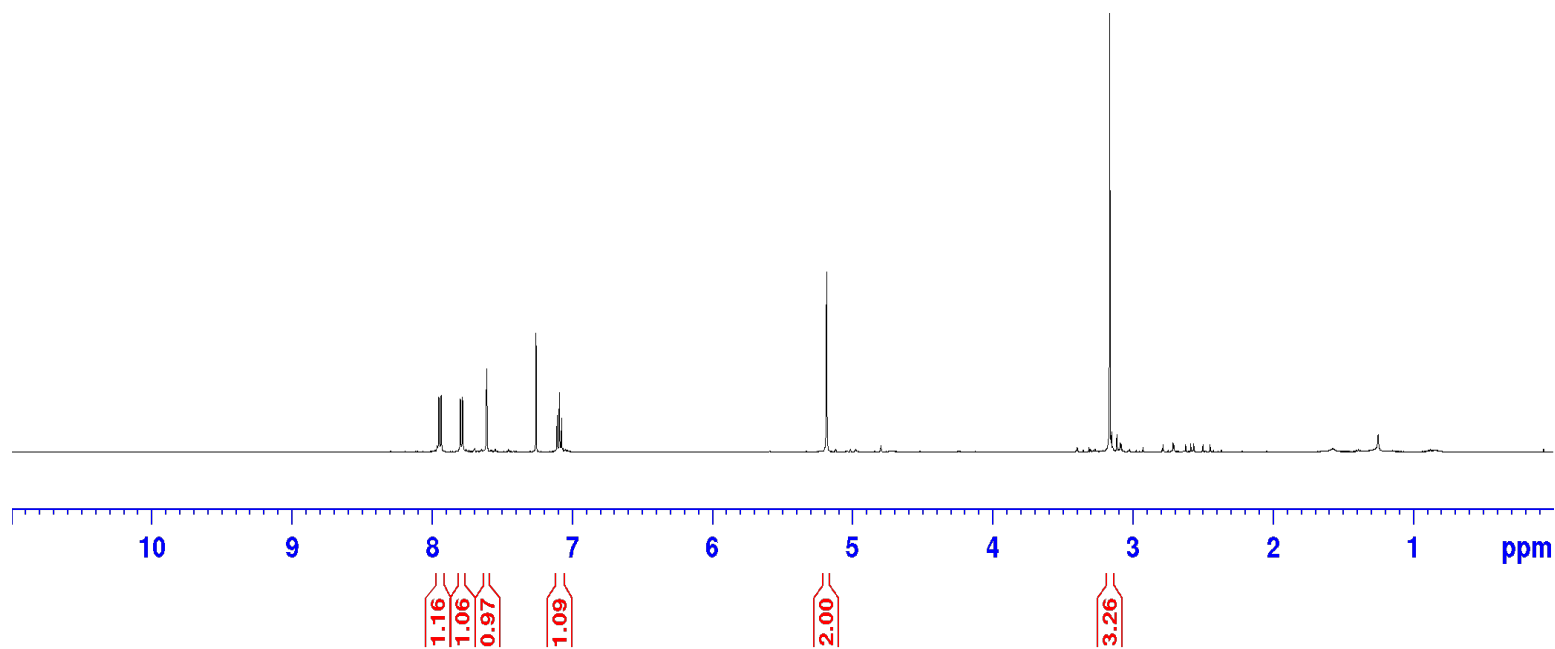

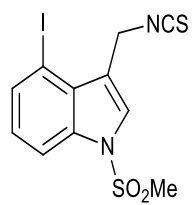

Compound **24** (expansion)

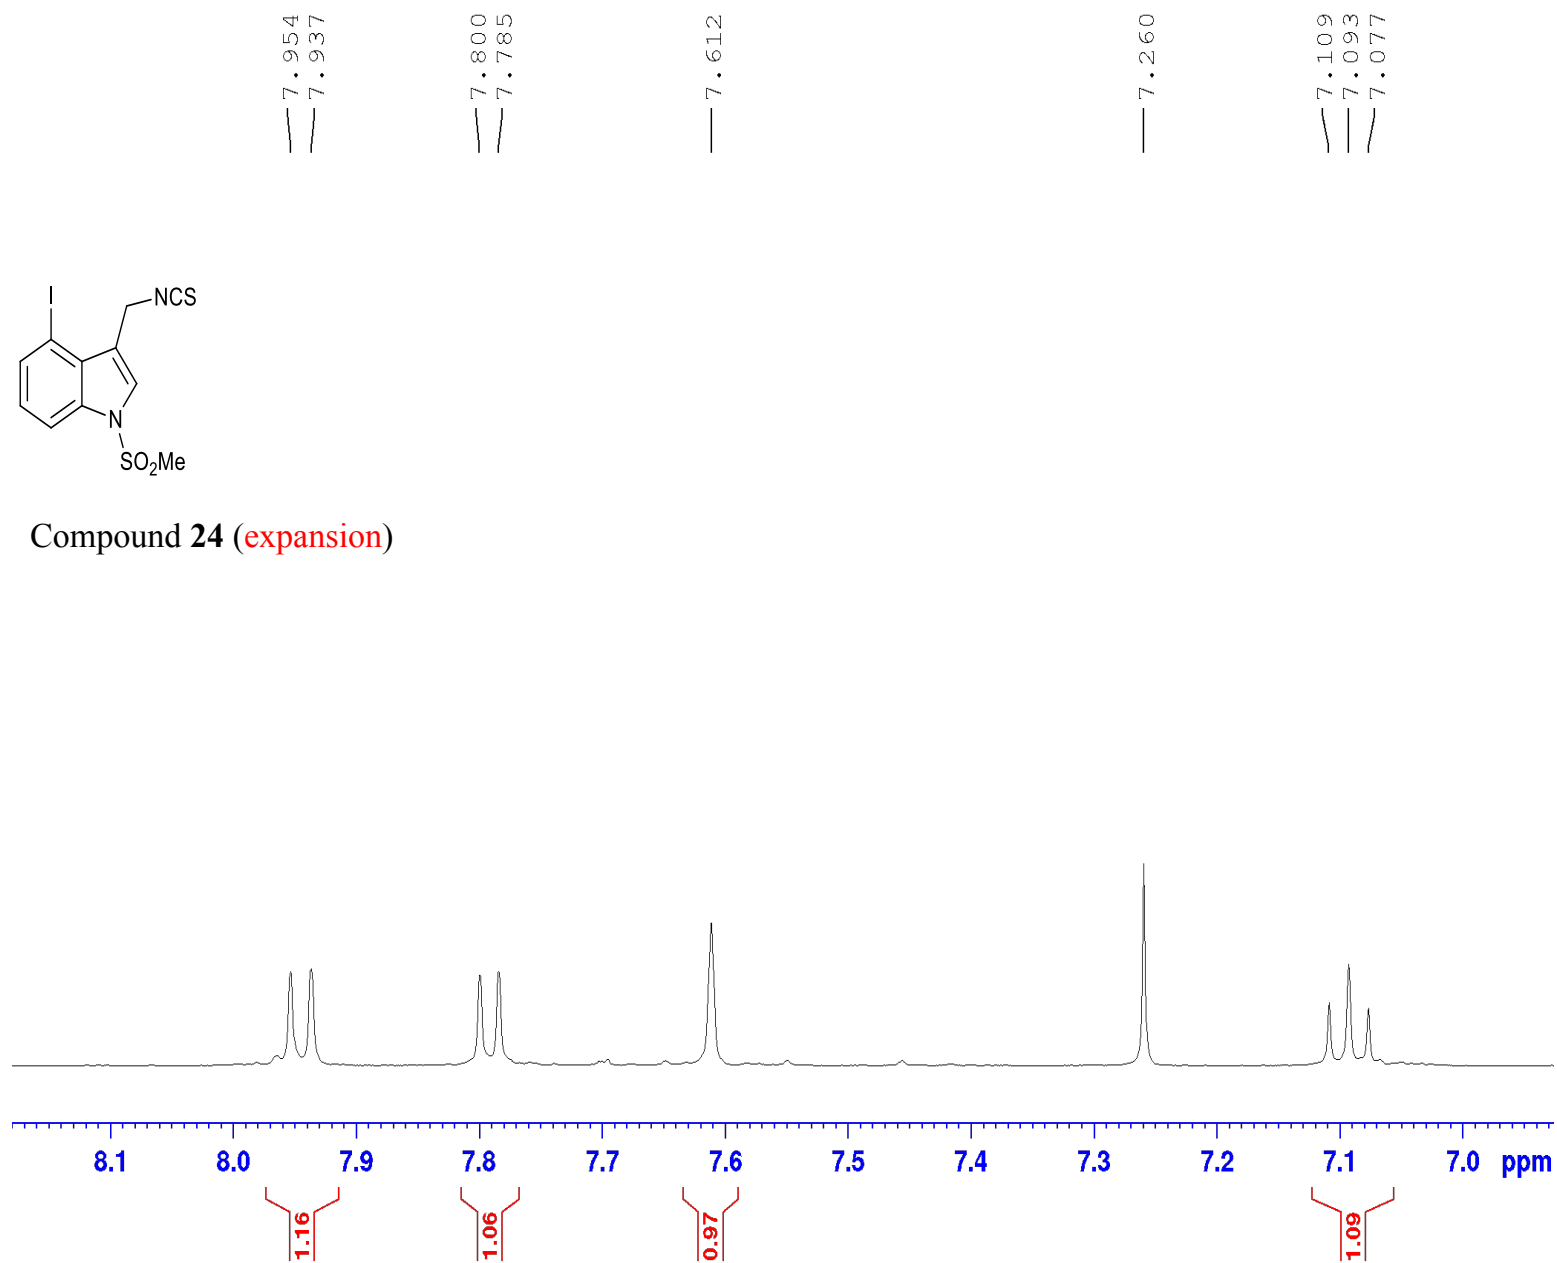

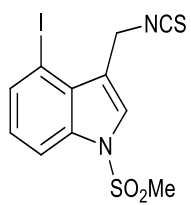

Compound **24** ( $\text{CDCl}_3$ )

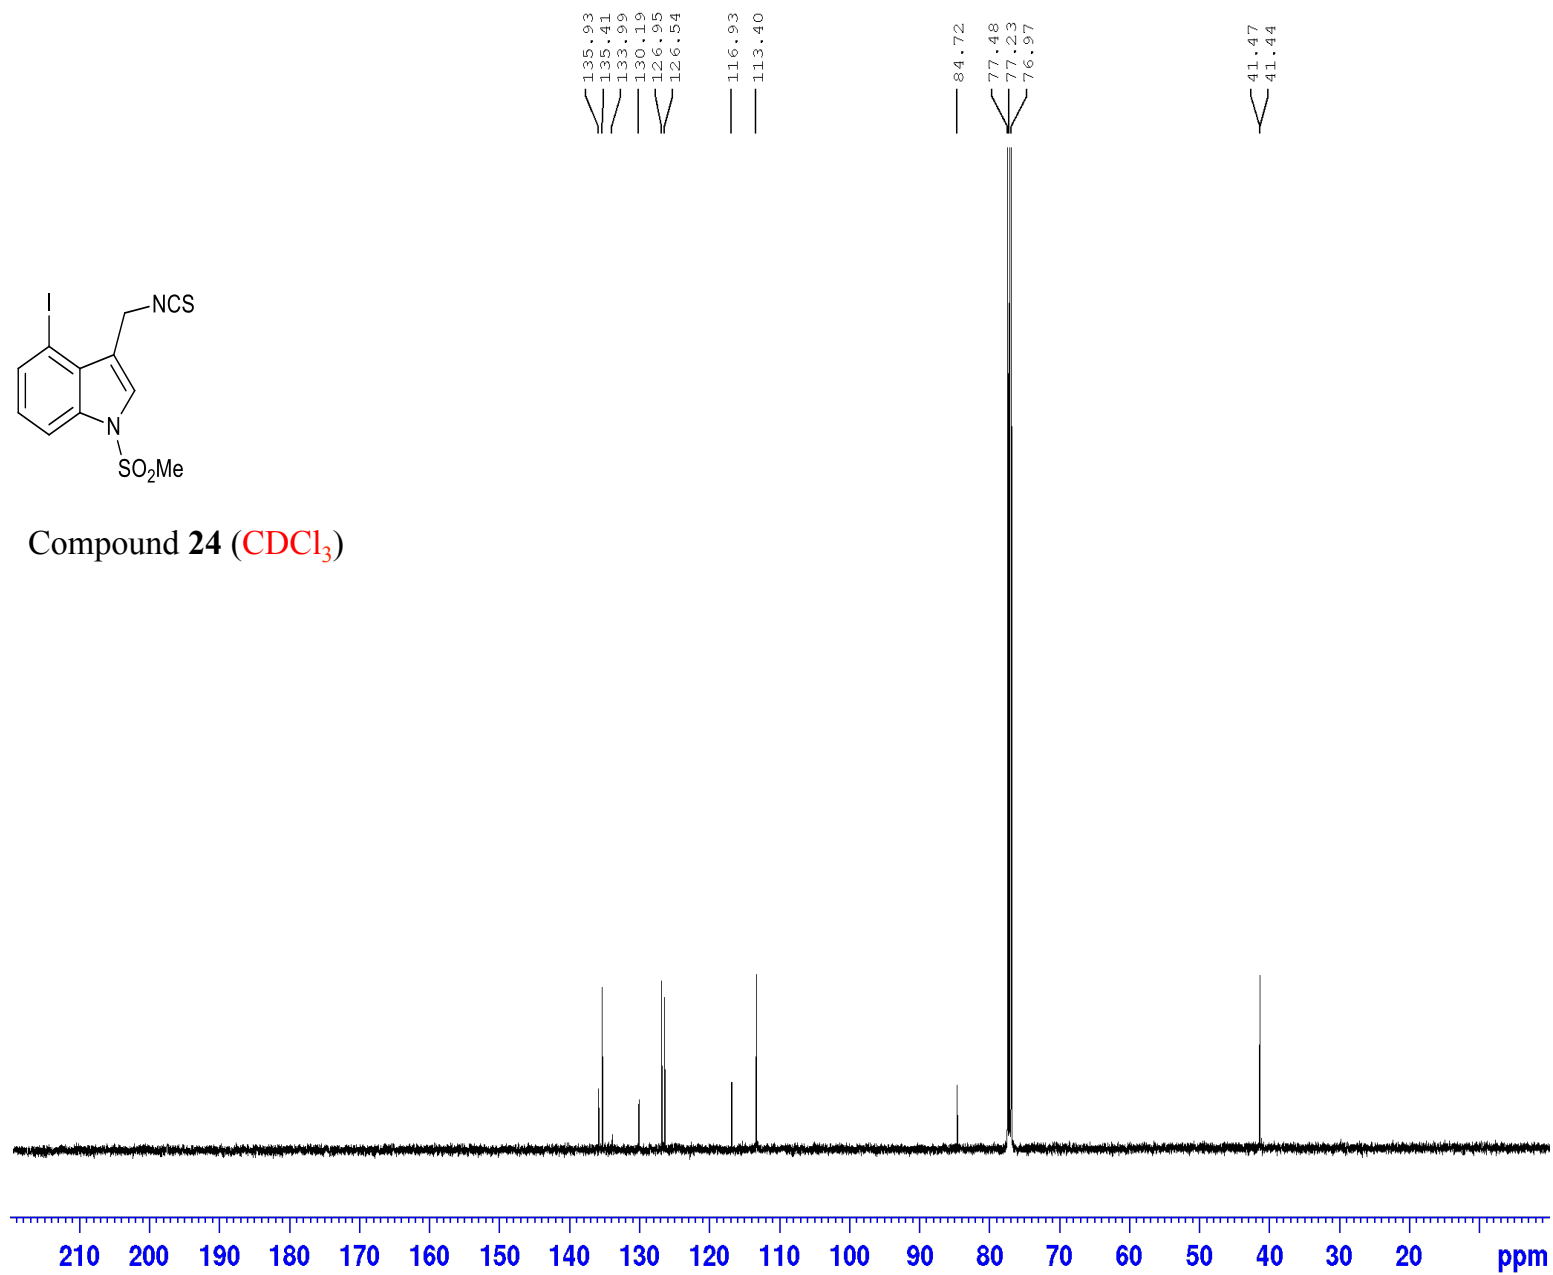



Compound **24** (expansion)

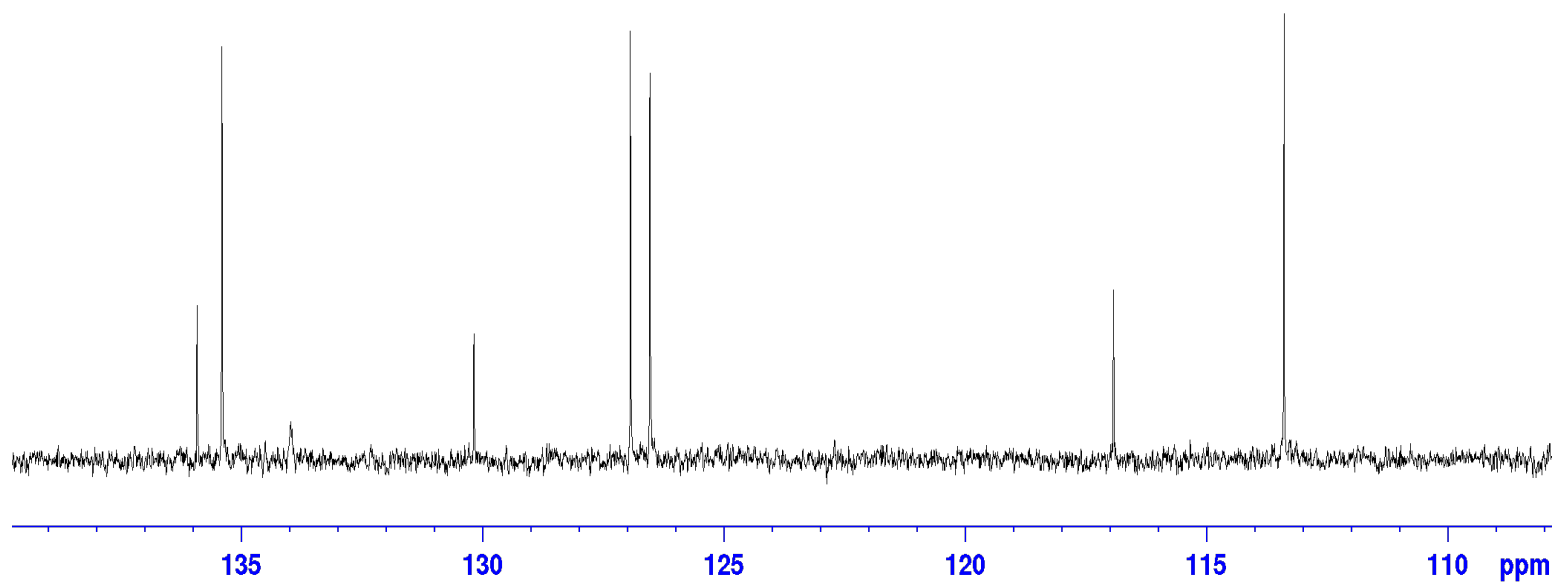

Supplement: c6cc02108e2.pdf [file c6cc02108e2.pdf]
